# Supplementary material for: Sustainable mechanosynthesis of diamide tetraols monomers and their enzymatic polymerization
Source: Royal Society of Chemistry journal article supplement (doi:10.1039/d3gc02823b), 2023-10-31
Supplement: d3gc02823b1.pdf [file d3gc02823b1.pdf]

# Supporting Information

## Sustainable Mechano-synthesis of Novel Tetraol Monomers and Their Enzymatic Polymerization

*Chloé Herrlé<sup>[a]</sup>‡, Sami Fadlallah<sup>[b]</sup>‡\*, Sylvestre Toumieux<sup>[a]</sup>, Anne Wadouachi<sup>[a]</sup>\*, Florent Allais<sup>[b]</sup>\**

<sup>[a]</sup> Laboratoire de Glycochimie, des Antimicrobiens et des Agroressources (LG2A) UR 7378. Université de Picardie Jules Verne, Institut de Chimie de Picardie 33 rue Saint Leu, FR-80039 Amiens, France

<sup>[b]</sup> URD Agro-Biotechnologies Industrielles (ABI), CEBB, AgroParisTech, 3 rue des Rouges-Terres, 51110 Pomacle

\* [sami.fadlallah@agroparistech.fr](mailto:sami.fadlallah@agroparistech.fr), [anne.wadouachi@u-picardie.fr](mailto:anne.wadouachi@u-picardie.fr),  
[florent.allais@agroparistech.fr](mailto:florent.allais@agroparistech.fr)

‡ These authors contributed equally to this work

|                                      |     |
|--------------------------------------|-----|
| Table of contents                    |     |
| Calculation of green metrics .....   | S2  |
| Table of failed polymerizations..... | S7  |
| NMR.....                             | S8  |
| SEC .....                            | S13 |
| DSC.....                             | S19 |
| TGA .....                            | S28 |
| Polymer picture .....                | S36 |
| Aza-Michael addition onto HBO .....  | S37 |

**Table S1.** E-factors at mg scale

| Entry | Diamine                 | Masse diamine (mg) | Masse 2H-HBO 1 (mg) | Yield % | Masse 2a-d (mg) | E-factor (ideal value = 0) |
|-------|-------------------------|--------------------|---------------------|---------|-----------------|----------------------------|
| 1     | Diaminohexane           | 80,6               | 144,1               | 76 (2a) | 162,6           | 0,38                       |
| 2     | Spermidine              | 116,1              | 169,4               | 62 (2b) | 170,2           | 0,68                       |
| 3     | Spermine                | 106,6              | 111                 | 53 (2c) | 109,9           | 0,98                       |
| 4     | 4,9-dioxadodecandiamine | 159,6              | 164,9               | 80 (2d) | 246             | 0,32                       |

**Table S2.** E-factors at g scale

| Entry | Diamine                 | Masse diamine (g) | Masse 2H-HBO 1 (g) | Yield % | Masse 2a-d (g) | E-factor (ideal value = 0) |
|-------|-------------------------|-------------------|--------------------|---------|----------------|----------------------------|
| 1     | Diaminohexane           | 0,9               | 1,7                | 67 (2a) | 1,7            | 0,53                       |
| 2     | Spermidine              | 1,5               | 2,2                | 72 (2b) | 2,53           | 0,46                       |
| 3     | Spermine                | 1,9               | 2                  | 60 (2c) | 2,23           | 0,75                       |
| 4     | 4,9-dioxadodecandiamine | 1,7               | 1,7                | 73 (2d) | 2,35           | 0,45                       |

**Table S3.** EcoScale at g and mg scales for compound **2a**

| Parameters                                                  | Penalty points  | Synthesis for 2a (mg scale) | Explanations                                  | Synthesis for 2a (g scale) | Explanations                                  |
|-------------------------------------------------------------|-----------------|-----------------------------|-----------------------------------------------|----------------------------|-----------------------------------------------|
| 1. Yield                                                    | (100 - yield)/2 | 12                          | Yield : 76 %                                  | 17                         | Yield : 67 %                                  |
| 2. Reactant price (to obtain 10 mmol of final product)      | Total =         | 0                           |                                               | 0                          |                                               |
| Inexpensive (< 10 €)                                        | 0               | 0                           | 2H-HBO (3,07 g), diaminohexane (1,72 g)       | 0                          | 2H-HBO (3,47 g), diaminohexane (1,84 g)       |
| Expensive (>10 € et <50 €)                                  | 3               | 0                           |                                               | 0                          |                                               |
| Very expensive (> 50 €)                                     | 5               | 0                           |                                               | 0                          |                                               |
| 3.Safety                                                    | Total =         | 10                          |                                               | 10                         |                                               |
| N (dangerous for the environment)                           | 5               | 0                           |                                               | 0                          |                                               |
| Corrosive                                                   | 5               | 5                           | Diaminohexane                                 | 5                          | Diaminohexane                                 |
| T (toxic)                                                   | 5               | 5                           | Diaminohexane                                 | 5                          | Diaminohexane                                 |
| F (highly flammable)                                        | 5               | 0                           |                                               | 0                          |                                               |
| E (explosive)                                               | 10              | 0                           |                                               | 0                          |                                               |
| F+ (extremely flammable)                                    | 10              | 0                           |                                               | 0                          |                                               |
| T+ (extremely toxic)                                        | 10              | 0                           |                                               | 0                          |                                               |
| 4. Technical setup                                          | Total =         | 2                           |                                               | 2                          |                                               |
| Common setup                                                | 0               | 0                           |                                               | 0                          |                                               |
| Instrument for controlled addition (dropping funnel, etc. ) | 1               | 0                           |                                               | 0                          |                                               |
| Unconventional activation technique (microwave, etc. )      | 2               | 2                           | Ball-milling                                  | 2                          | Ball-milling                                  |
| Pressur equipment > 1 atm                                   | 3               | 0                           |                                               | 0                          |                                               |
| Any additional special glassware                            | 1               | 0                           |                                               | 0                          |                                               |
| (Inert) gas atmosphere                                      | 1               | 0                           |                                               | 0                          |                                               |
| Glove box                                                   | 3               | 0                           |                                               | 0                          |                                               |
| 5. Temperature/time                                         | Total =         | 1                           |                                               | 1                          |                                               |
| Room temperature, < 1 h                                     | 0               | 0                           |                                               | 0                          |                                               |
| Room temperature, < 24 h                                    | 1               | 1                           |                                               | 1                          |                                               |
| Heating, < 1 h                                              | 2               | 0                           |                                               | 0                          |                                               |
| Heating, > 1 h                                              | 3               | 0                           |                                               | 0                          |                                               |
| Cooling to 0 °C                                             | 4               | 0                           |                                               | 0                          |                                               |
| Cooling < 0 °C                                              | 5               | 0                           |                                               | 0                          |                                               |
| 6. Workup/purification                                      | Total =         | 10                          |                                               | 10                         |                                               |
| None                                                        | 0               | 0                           |                                               | 0                          |                                               |
| Cooling to room temperature                                 | 0               | 0                           |                                               | 0                          |                                               |
| Adding solvent                                              | 0               | 0                           | MeOH to remove the crude product from the jar | 0                          | MeOH to remove the crude product from the jar |
| Simple filtration                                           | 0               | 0                           |                                               | 0                          |                                               |
| Removal of solvent with bp < 150 °C                         | 0               | 0                           | MeOH before purification                      | 0                          | MeOH before purification                      |
| Crystallization and filtration                              | 1               | 0                           |                                               | 0                          |                                               |
| Removal of solvent with bp > 150 °C                         | 2               | 0                           |                                               | 0                          |                                               |
| Solid phase extraction                                      | 2               | 0                           |                                               | 0                          |                                               |
| Distillation                                                | 3               | 0                           |                                               | 0                          |                                               |
| Sublimation                                                 | 3               | 0                           |                                               | 0                          |                                               |
| Liquid-liquid extraction                                    | 3               | 0                           |                                               | 0                          |                                               |
| Classical chromatography                                    | 10              | 10                          | Yes                                           | 10                         | Yes                                           |
| Total                                                       |                 | 35                          |                                               | 40                         |                                               |
| Ecoscale (/100)                                             |                 | 65                          |                                               | 60                         |                                               |

**Table S4. EcoScale at g and mg scales for compound 2b**

| Parameters                                                 | Penalty points | Synthesis of 2b (mg scale) | Explanations                                  | Synthesis for 2b (g scale) | Explanations                                  |
|------------------------------------------------------------|----------------|----------------------------|-----------------------------------------------|----------------------------|-----------------------------------------------|
| 1. Yield                                                   | (100-yield)/2  | 19                         | Yield : 62 %                                  | 14                         | Yield : 72 %                                  |
| 2. Reactant price (to obtain 10 mmol of final product)     | Total =        | 5                          |                                               | 5                          |                                               |
| Inexpensive (< 10 €)                                       | 0              | 0                          | 2H-HBO (3,76 g)                               | 0                          | 2H-HBO (3,29 g)                               |
| Expensive (>10 € et <50 €)                                 | 3              | 0                          |                                               | 0                          |                                               |
| Very expensive (> 50 €)                                    | 5              | 5                          | Spermidine (2,58 g)                           | 5                          | Spermidine (2,24 g)                           |
| 3.Safety                                                   | Total =        | 5                          |                                               | 5                          |                                               |
| N (dangerous for the environment)                          | 5              | 0                          |                                               | 0                          |                                               |
| Corrosive                                                  | 5              | 5                          | Spermidine                                    | 5                          | Spermidine                                    |
| T (toxic)                                                  | 5              | 0                          |                                               | 0                          |                                               |
| F (highly flammable)                                       | 5              | 0                          |                                               | 0                          |                                               |
| E (explosive)                                              | 10             | 0                          |                                               | 0                          |                                               |
| F+ (extremely flammable)                                   | 10             | 0                          |                                               | 0                          |                                               |
| T+ (extremely toxic)                                       | 10             | 0                          |                                               | 0                          |                                               |
| 4. Technical setup                                         | Total =        | 2                          |                                               | 2                          |                                               |
| Common setup                                               | 0              | 0                          |                                               | 0                          |                                               |
| Instrument for controlled addition (dropping funnel, etc.) | 1              | 0                          |                                               | 0                          |                                               |
| Unconventional activation technique (microwave, etc.)      | 2              | 2                          | Ball-milling                                  | 2                          | Ball-milling                                  |
| Pressur equipment > 1 atm                                  | 3              | 0                          |                                               | 0                          |                                               |
| Any additional special glassware                           | 1              | 0                          |                                               | 0                          |                                               |
| (Inert) gas atmosphere                                     | 1              | 0                          |                                               | 0                          |                                               |
| Glove box                                                  | 3              | 0                          |                                               | 0                          |                                               |
| 5. Temperature/time                                        | Total =        | 1                          |                                               | 1                          |                                               |
| Room temperature, < 1 h                                    | 0              | 0                          |                                               | 0                          |                                               |
| Room temperature, < 24 h                                   | 1              | 1                          |                                               | 1                          |                                               |
| Heating, < 1 h                                             | 2              | 0                          |                                               | 0                          |                                               |
| Heating, > 1 h                                             | 3              | 0                          |                                               | 0                          |                                               |
| Cooling to 0 °C                                            | 4              | 0                          |                                               | 0                          |                                               |
| Cooling < 0 °C                                             | 5              | 0                          |                                               | 0                          |                                               |
| 6. Workup/purification                                     | Total =        | 10                         |                                               | 10                         |                                               |
| None                                                       | 0              | 0                          |                                               | 0                          |                                               |
| Cooling to room temperature                                | 0              | 0                          |                                               | 0                          |                                               |
| Adding solvent                                             | 0              | 0                          | MeOH to remove the crude product from the jar | 0                          | MeOH to remove the crude product from the jar |
| Simple filtration                                          | 0              | 0                          |                                               | 0                          |                                               |
| Removal of solvent with bp < 150 °C                        | 0              | 0                          | MeOH before purification                      | 0                          | MeOH before purification                      |
| Crystallization and filtration                             | 1              | 0                          |                                               | 0                          |                                               |
| Removal of solvent with bp > 150 °C                        | 2              | 0                          |                                               | 0                          |                                               |
| Solid phase extraction                                     | 2              | 0                          |                                               | 0                          |                                               |
| Distillation                                               | 3              | 0                          |                                               | 0                          |                                               |
| Sublimation                                                | 3              | 0                          |                                               | 0                          |                                               |
| Liquid-liquid extraction                                   | 3              | 0                          |                                               | 0                          |                                               |
| Classical chromatography                                   | 10             | 10                         | Yes                                           | 10                         | Yes                                           |
| Total                                                      |                | 42                         |                                               | 37                         |                                               |
| Ecoscale (/100)                                            |                | 58                         |                                               | 63                         |                                               |

**Table S5.** EcoScale at g and mg scales for compound **2c**

| Parameters                                                 | Penalty points  | Synthesis of 2c (mg scale) | Explanations                                   | Synthesis for 2c (g scale) | Explanations                                  |
|------------------------------------------------------------|-----------------|----------------------------|------------------------------------------------|----------------------------|-----------------------------------------------|
| 1. Yield                                                   | (100 - yield)/2 | 24                         | Yield : 53 %                                   | 20                         | Yield : 60 %                                  |
| 2. Reactant price (to obtain 10 mmol of final product)     | Total =         | 5                          |                                                | 5                          |                                               |
| Inexpensive (< 10 €)                                       | 0               | 0                          | 2H-HBO (4,44 g)                                | 0                          | 2H-HBO (3,90 g)                               |
| Expensive (>10 € et <50 €)                                 | 3               | 0                          |                                                | 0                          |                                               |
| Very expensive (>50 €)                                     | 5               | 5                          | Spermine (4,26 g)                              | 5                          | Spermine (3,71 g)                             |
| 3. Safety                                                  | Total =         | 5                          |                                                | 5                          |                                               |
| N (dangerous for the environment)                          | 5               | 0                          |                                                | 0                          |                                               |
| Corrosive                                                  | 5               | 5                          | Spermine                                       | 5                          | Spermine                                      |
| T (toxic)                                                  | 5               | 0                          |                                                | 0                          |                                               |
| F (highly flammable)                                       | 5               | 0                          |                                                | 0                          |                                               |
| E (explosive)                                              | 10              | 0                          |                                                | 0                          |                                               |
| F+ (extremely flammable)                                   | 10              | 0                          |                                                | 0                          |                                               |
| T+ (extremely toxic)                                       | 10              | 0                          |                                                | 0                          |                                               |
| 4. Technical setup                                         | Total =         | 2                          |                                                | 2                          |                                               |
| Common setup                                               | 0               | 0                          |                                                | 0                          |                                               |
| Instrument for controlled addition (dropping funnel, etc.) | 1               | 0                          |                                                | 0                          |                                               |
| Unconventional activation technique (microwave, etc.)      | 2               | 2                          | Ball-milling                                   | 2                          | Ball-milling                                  |
| Pressur equipment > 1 atm                                  | 3               | 0                          |                                                | 0                          |                                               |
| Any additional special glassware                           | 1               | 0                          |                                                | 0                          |                                               |
| (Inert) gas atmosphere                                     | 1               | 0                          |                                                | 0                          |                                               |
| Glove box                                                  | 3               | 0                          |                                                | 0                          |                                               |
| 5. Temperature/time                                        | Total =         | 1                          |                                                | 1                          |                                               |
| Room temperature, < 1 h                                    | 0               | 0                          |                                                | 0                          |                                               |
| Room temperature, < 24 h                                   | 1               | 1                          |                                                | 1                          |                                               |
| Heating, < 1 h                                             | 2               | 0                          |                                                | 0                          |                                               |
| Heating, > 1 h                                             | 3               | 0                          |                                                | 0                          |                                               |
| Cooling to 0 °C                                            | 4               | 0                          |                                                | 0                          |                                               |
| Cooling < 0 °C                                             | 5               | 0                          |                                                | 0                          |                                               |
| 6. Workup/purification                                     | Total =         | 10                         |                                                | 10                         |                                               |
| None                                                       | 0               | 0                          |                                                | 0                          |                                               |
| Cooling to room temperature                                | 0               | 0                          |                                                | 0                          |                                               |
| Adding solvent                                             | 0               | 0                          | Water to remove the crude product from the jar | 0                          | MeOH to remove the crude product from the jar |
| Simple filtration                                          | 0               | 0                          |                                                | 0                          |                                               |
| Removal of solvent with bp < 150 °C                        | 0               | 0                          |                                                | 0                          | MeOH before purification                      |
| Crystallization and filtration                             | 1               | 0                          |                                                | 0                          |                                               |
| Removal of solvent with bp > 150 °C                        | 2               | 0                          |                                                | 0                          |                                               |
| Solid phase extraction                                     | 2               | 0                          |                                                | 0                          |                                               |
| Distillation                                               | 3               | 0                          |                                                | 0                          |                                               |
| Sublimation                                                | 3               | 0                          |                                                | 0                          |                                               |
| Liquid-liquid extraction                                   | 3               | 0                          |                                                | 0                          |                                               |
| Classical chromatography                                   | 10              | 10                         | Yes                                            | 10                         | Yes                                           |
| Total                                                      |                 | 47                         |                                                | 43                         |                                               |
| Ecoscale (/100)                                            |                 | 53                         |                                                | 57                         |                                               |

**Table S6.** EcoScale at g and mg scales for compound **2d**

| Parameters                                                 | Penalty points  | Synthesis of 2d (mg scale) | Explanations                                      | Synthesis for 2d (g scale) | Explanations                                      |
|------------------------------------------------------------|-----------------|----------------------------|---------------------------------------------------|----------------------------|---------------------------------------------------|
| 1. Yield                                                   | (100 - yield)/2 | 10                         | Yield : 80 %                                      | 14                         | Yield : 73%                                       |
| 2. Reactant price (to obtain 10 mmol of final product)     | Total =         | 0                          |                                                   | 0                          |                                                   |
| Inexpensive (< 10 €)                                       | 0               | 0                          | 2H-HBO (2,95 g), 4,9-dioxadodecandiamine (2,86 g) | 0                          | 2H-HBO (3,22 g), 4,9-dioxadodecandiamine (3,11 g) |
| Expensive (>10 € et <50 €)                                 | 3               | 0                          |                                                   | 0                          |                                                   |
| Very expensive (> 50 €)                                    | 5               | 0                          |                                                   | 0                          |                                                   |
| 3.Safety                                                   | Total =         | 5                          |                                                   | 5                          |                                                   |
| N (dangerous for the environment)                          | 5               | 0                          |                                                   | 0                          |                                                   |
| Corrosive                                                  | 5               | 5                          | 4,9-dioxadodecandiamine                           | 5                          | 4,9-dioxadodecandiamine                           |
| T (toxic)                                                  | 5               | 0                          |                                                   | 0                          |                                                   |
| F (highly flammable)                                       | 5               | 0                          |                                                   | 0                          |                                                   |
| E (explosive)                                              | 10              | 0                          |                                                   | 0                          |                                                   |
| F+ (extremely flammable)                                   | 10              | 0                          |                                                   | 0                          |                                                   |
| T+ (extremely toxic)                                       | 10              | 0                          |                                                   | 0                          |                                                   |
| 4. Technical setup                                         | Total =         | 2                          |                                                   | 2                          |                                                   |
| Common setup                                               | 0               | 0                          |                                                   | 0                          |                                                   |
| Instrument for controlled addition (dropping funnel, etc.) | 1               | 0                          |                                                   | 0                          |                                                   |
| Unconventional activation technique (microwave, etc.)      | 2               | 2                          | Ball-milling                                      | 2                          | Ball-milling                                      |
| Pressur equipment > 1 atm                                  | 3               | 0                          |                                                   | 0                          |                                                   |
| Any additional special glassware                           | 1               | 0                          |                                                   | 0                          |                                                   |
| (Inert) gas atmosphere                                     | 1               | 0                          |                                                   | 0                          |                                                   |
| Glove box                                                  | 3               | 0                          |                                                   | 0                          |                                                   |
| 5. Temperature/time                                        | Total =         | 1                          |                                                   | 1                          |                                                   |
| Room temperature, < 1 h                                    | 0               | 0                          |                                                   | 0                          |                                                   |
| Room temperature, < 24 h                                   | 1               | 1                          |                                                   | 1                          |                                                   |
| Heating, < 1 h                                             | 2               | 0                          |                                                   | 0                          |                                                   |
| Heating, > 1 h                                             | 3               | 0                          |                                                   | 0                          |                                                   |
| Cooling to 0 °C                                            | 4               | 0                          |                                                   | 0                          |                                                   |
| Cooling < 0 °C                                             | 5               | 0                          |                                                   | 0                          |                                                   |
| 6. Workup/purification                                     | Total =         | 10                         |                                                   | 1                          |                                                   |
| None                                                       | 0               | 0                          |                                                   | 0                          |                                                   |
| Cooling to room temperature                                | 0               | 0                          |                                                   | 0                          |                                                   |
| Adding solvent                                             | 0               | 0                          | MeOH to remove the crude product from the jar     | 0                          | MeOH to remove the crude product from the jar     |
| Simple filtration                                          | 0               | 0                          |                                                   | 0                          |                                                   |
| Removal of solvent with bp < 150 °C                        | 0               | 0                          | MeOH before purification                          | 0                          | MeOH before purification                          |
| Crystallization and filtration                             | 1               | 0                          |                                                   | 1                          | Trituration in hot acetone and filtration         |
| Removal of solvent with bp > 150 °C                        | 2               | 0                          |                                                   | 0                          |                                                   |
| Solid phase extraction                                     | 2               | 0                          |                                                   | 0                          |                                                   |
| Distillation                                               | 3               | 0                          |                                                   | 0                          |                                                   |
| Sublimation                                                | 3               | 0                          |                                                   | 0                          |                                                   |
| Liquid-liquid extraction                                   | 3               | 0                          |                                                   | 0                          |                                                   |
| Classical chromatography                                   | 10              | 10                         | Yes                                               | 0                          |                                                   |
| Total                                                      |                 | 28                         |                                                   | 23                         |                                                   |
| Ecoscale (/100)                                            |                 | 72                         |                                                   | 77                         |                                                   |

**Table S7.** Failed polymerization reactions using the described reaction conditions.

| Entry | Tetraol   | Tetraol/DMS | Enz. wt% | Solv.   | T (°C) | t (h) |
|-------|-----------|-------------|----------|---------|--------|-------|
| 19    | <b>2a</b> | 1           | 5        | -       | 90     | 24    |
| 20    | <b>2a</b> | 1           | 5        | Cyrene™ | 90     | 24    |
| 21    | <b>2a</b> | 1           | 5        | DMI     | 90     | 24    |
| 22    | <b>2a</b> | 1           | 5        | DPE     | 40     | 24    |
| 23    | <b>2b</b> | 1           | 20       | DPE     | 90     | 24    |
| 24    | <b>2b</b> | 1           | 5        | DPE     | 90     | 24    |
| 25    | <b>2b</b> | 0.5         | 20       | DPE     | 90     | 24    |
| 26    | <b>2b</b> | 1           | 20       | Cyrene™ | 90     | 24    |
| 27    | <b>2b</b> | 1           | 20       | DMI     | 90     | 24    |
| 28    | <b>2c</b> | 1           | 20       | DPE     | 90     | 24    |
| 29    | <b>2c</b> | 1           | 5        | DPE     | 90     | 24    |
| 30    | <b>2c</b> | 0.5         | 20       | DPE     | 90     | 24    |
| 31    | <b>2c</b> | 1           | 20       | Cyrene™ | 90     | 24    |
| 32    | <b>2c</b> | 1           | 20       | DMI     | 90     | 24    |

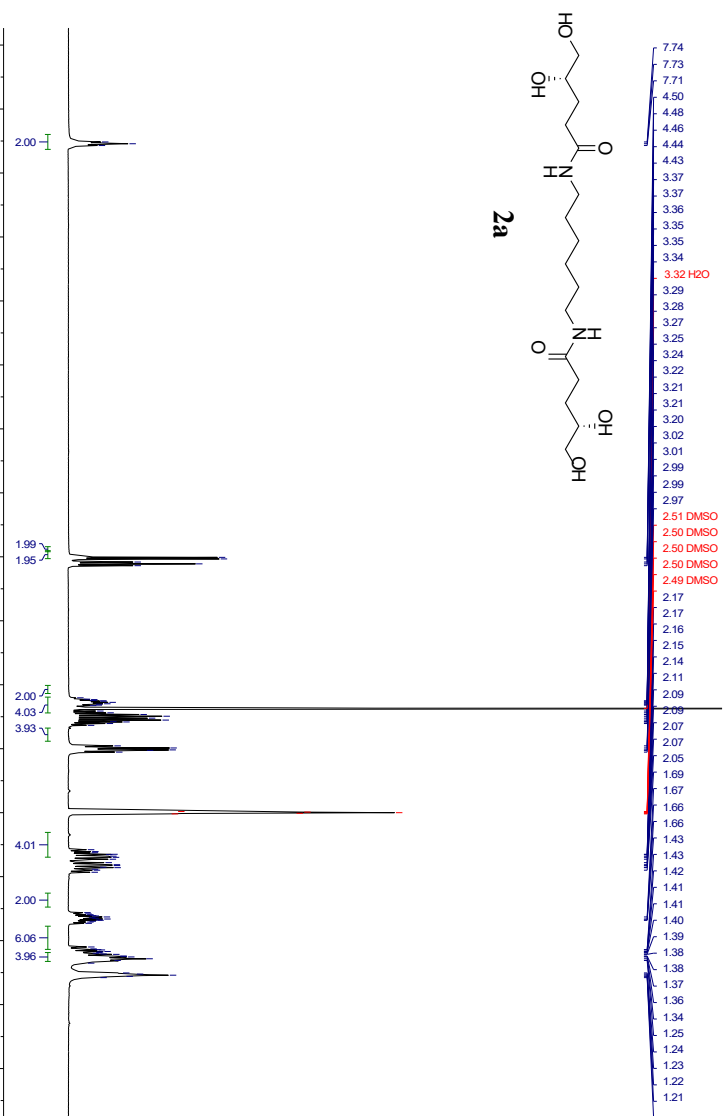

**Figure S1.** <sup>1</sup>H NMR (Table 1, Entry 3) spectrum of **2a**.

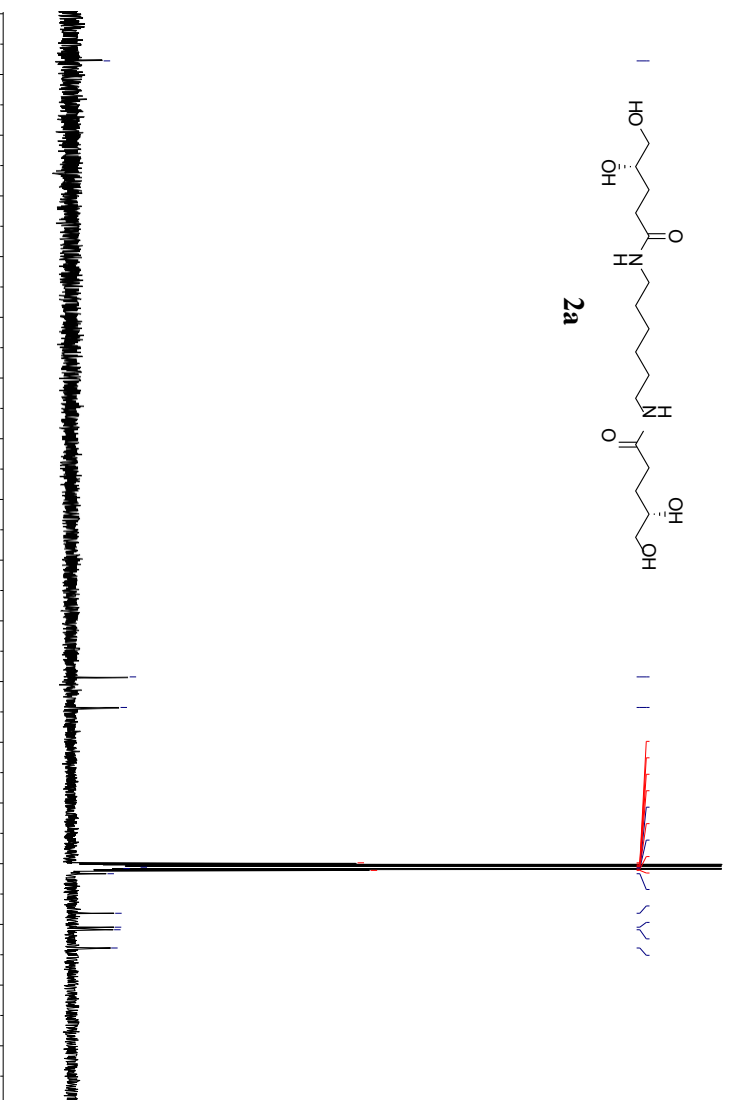

**Figure S2.** <sup>13</sup>C NMR (Table 1, Entry 3) spectrum of **2a**.



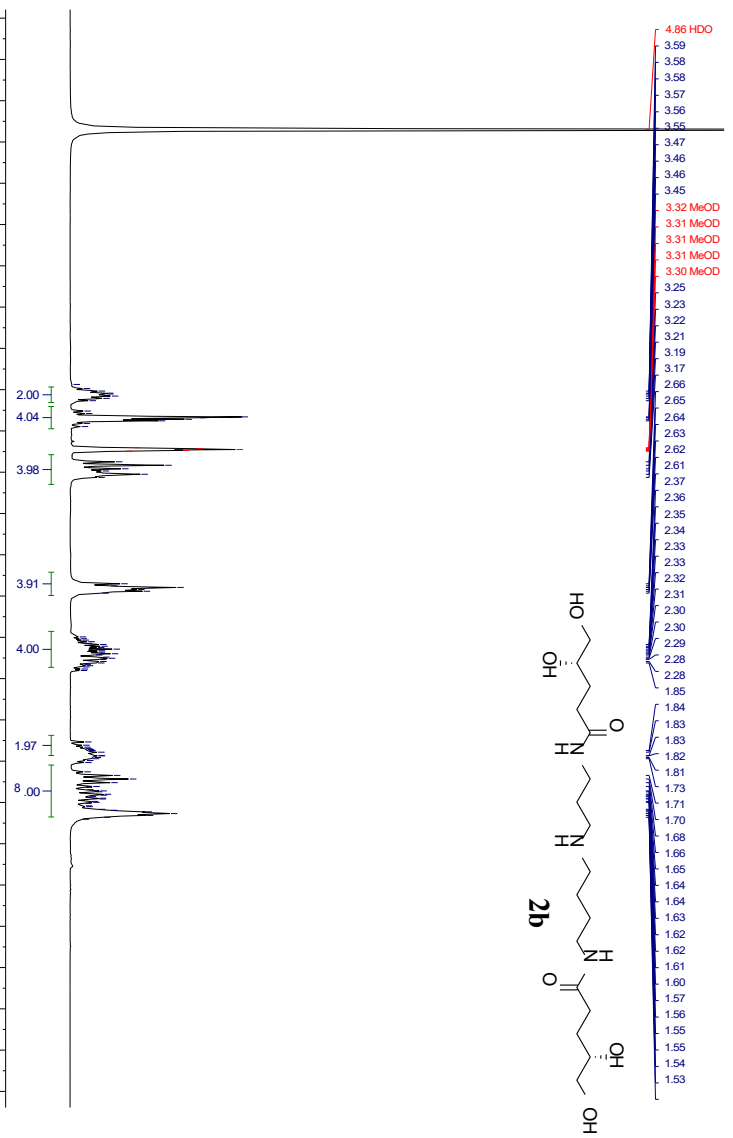

Figure S3. <sup>1</sup>H NMR (Table 1, Entry 4) spectrum of **2b**.

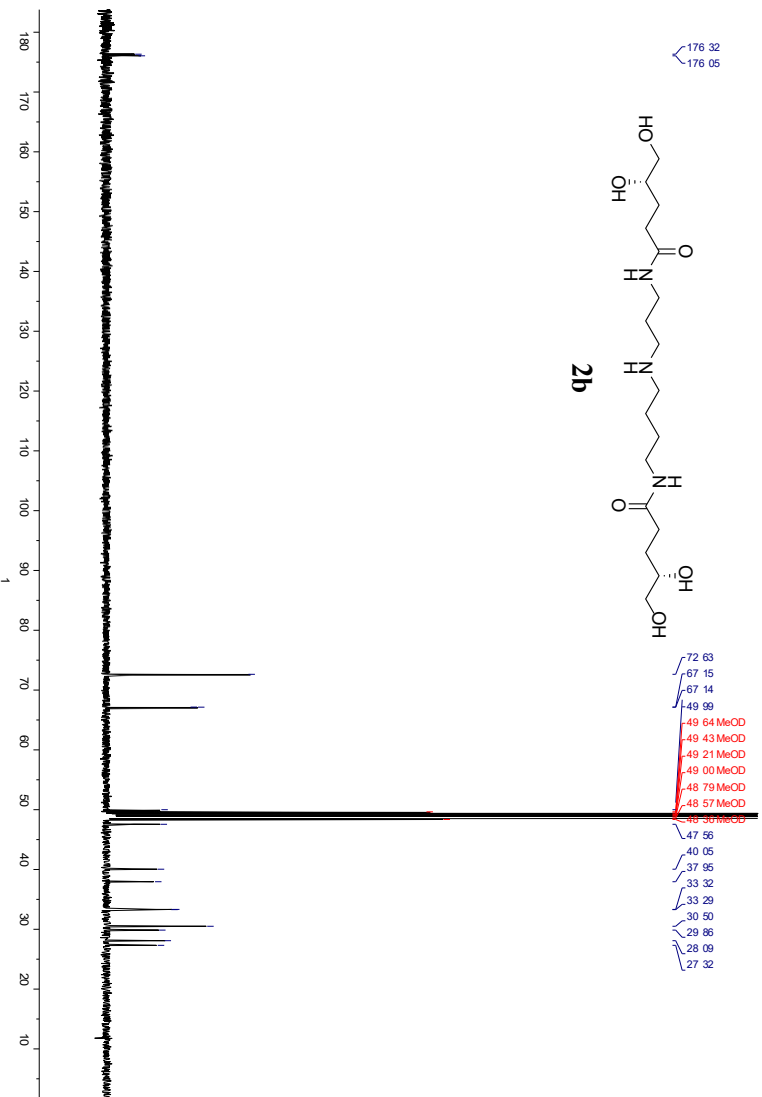

Figure S4. <sup>13</sup>C NMR (Table 1, Entry 4) spectrum of **2b**.



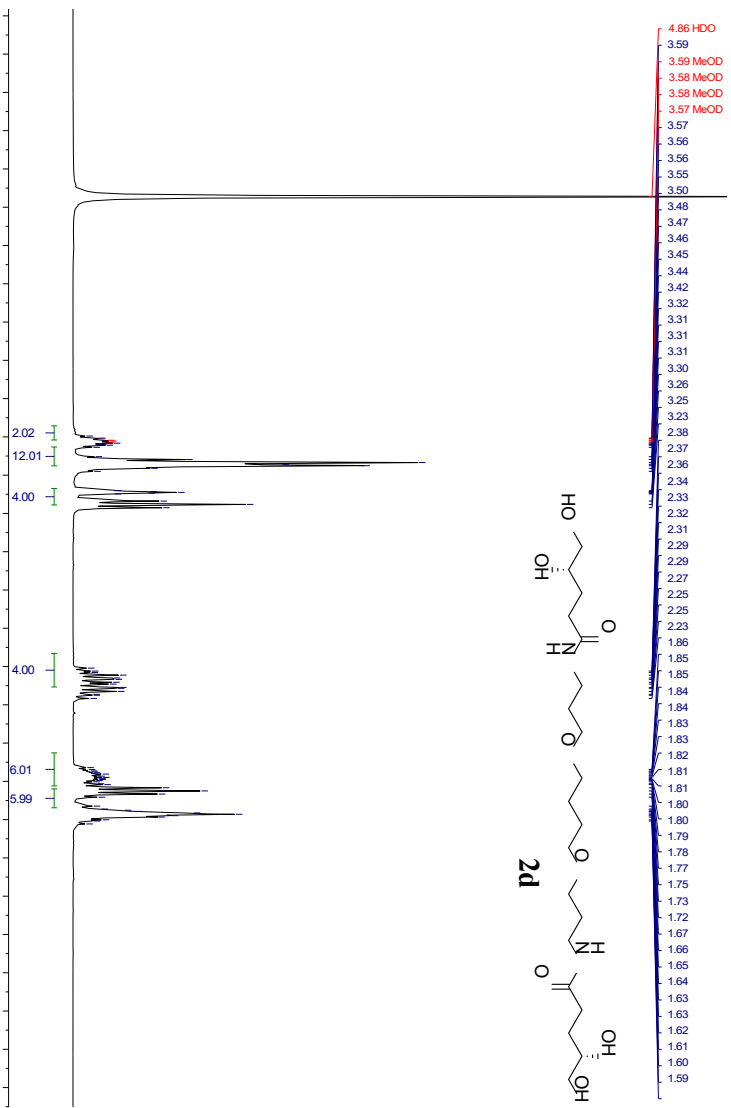

Figure S7.  $^1\text{H}$  NMR (Table 1, Entry 6) spectrum of **2d**.

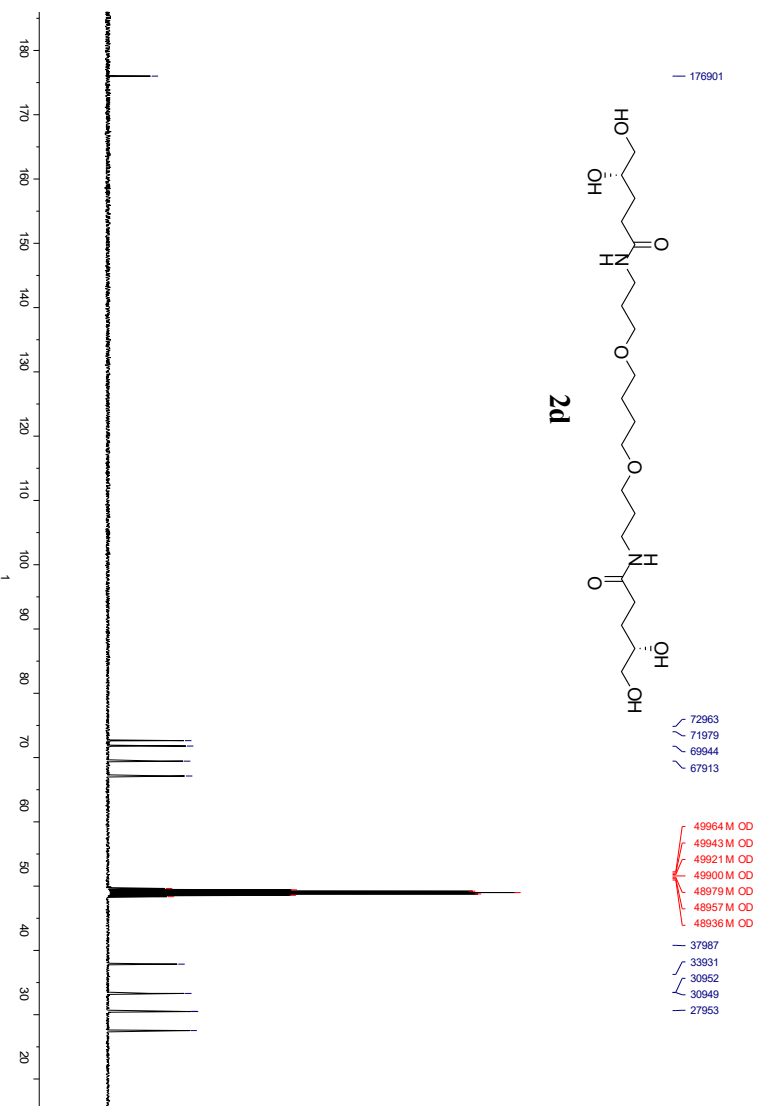

Figure S8.  $^{13}\text{C}$  NMR (Table 1, Entry 6) spectrum of **2d**.

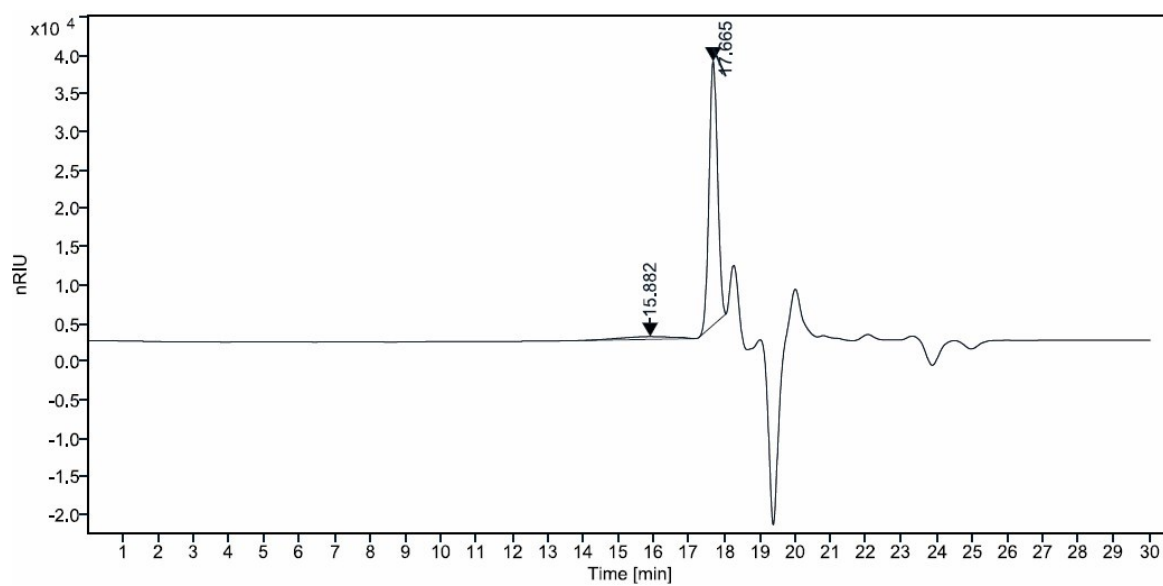

**Figure S9.** SEC trace of entry 1, Table 4.

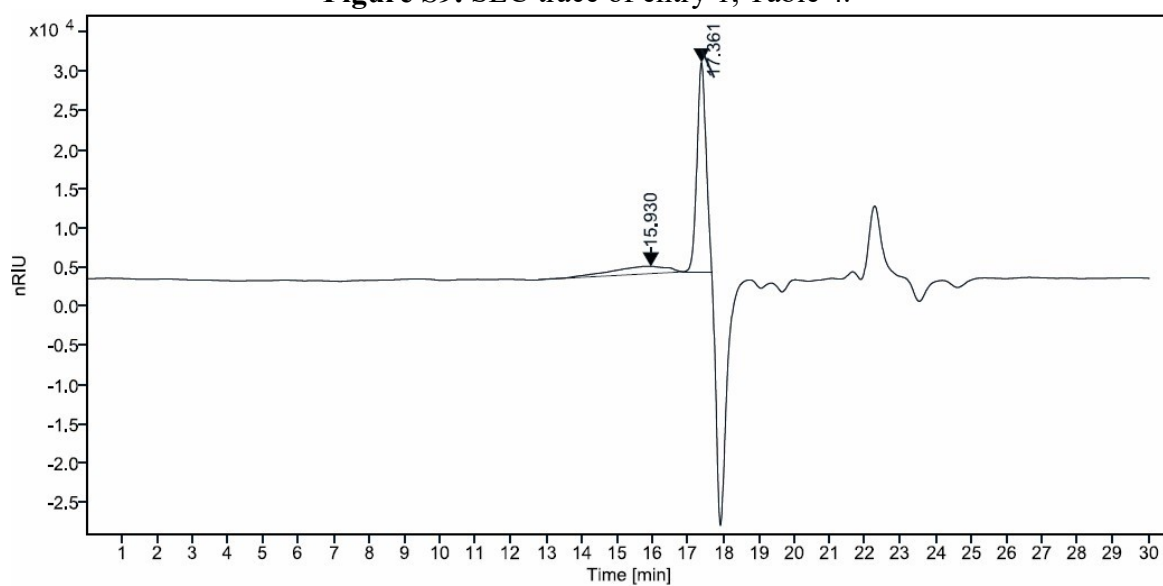

**Figure S10.** SEC trace of entry 2, Table 4.

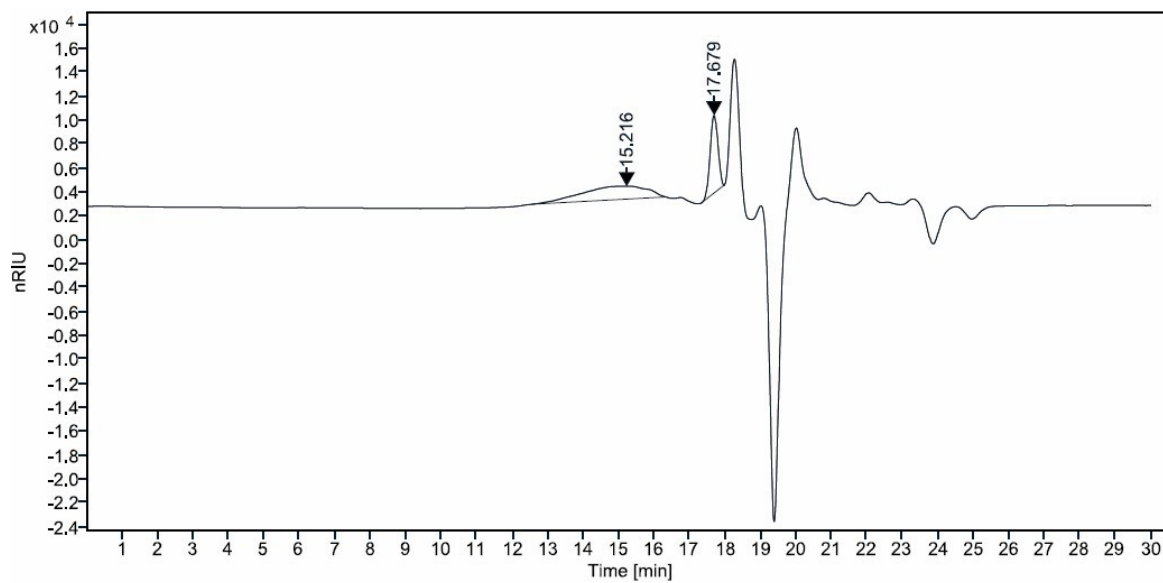

**Figure S11.** SEC trace of entry 3, Table 4.

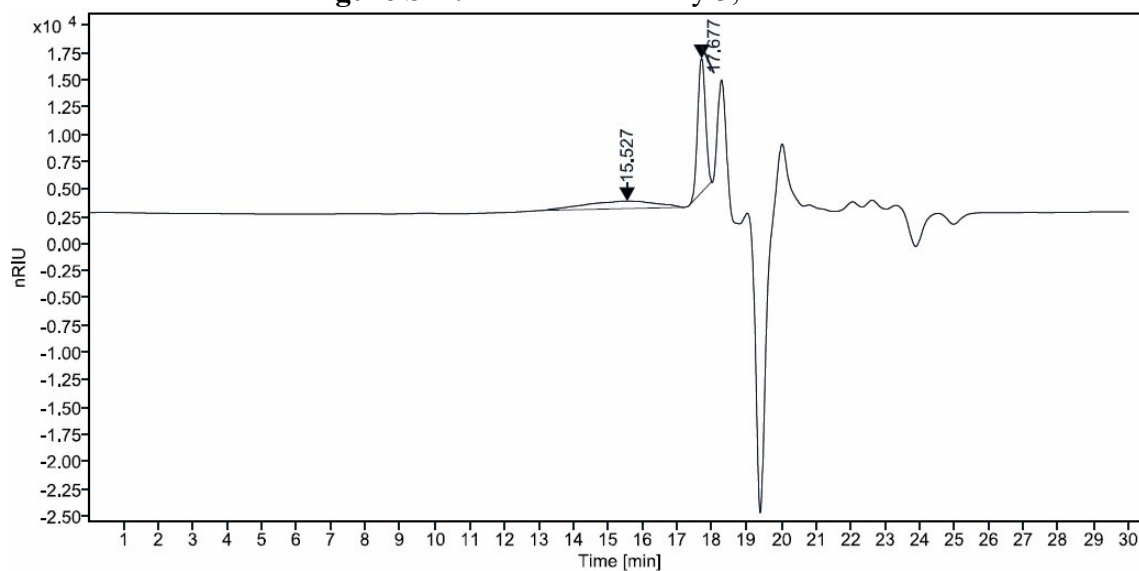

**Figure S12.** SEC trace of entry 4, Table 4.

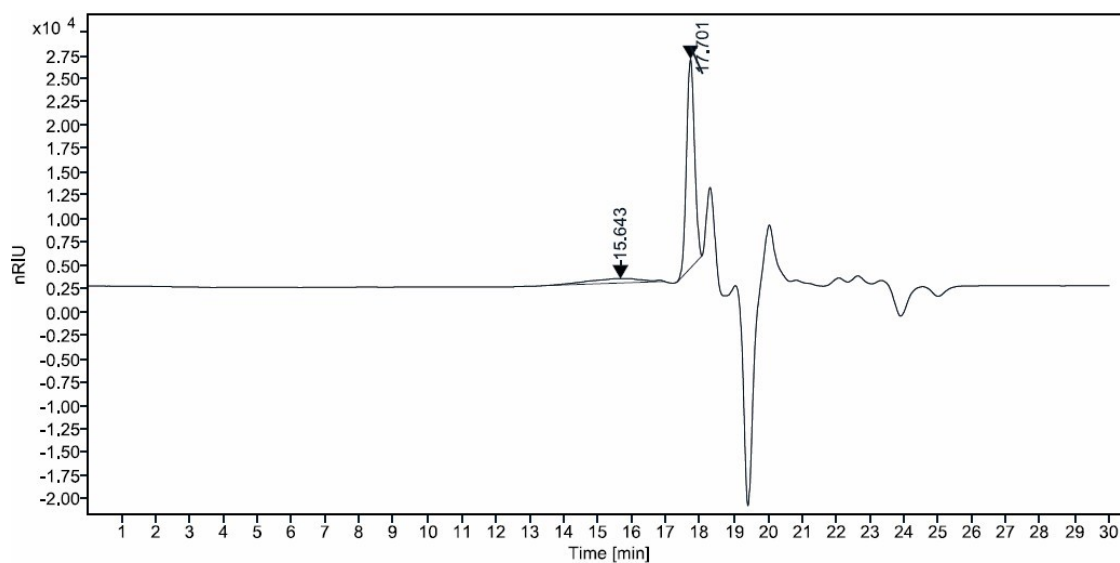

**Figure S13.** SEC trace of entry 8, Table 4.

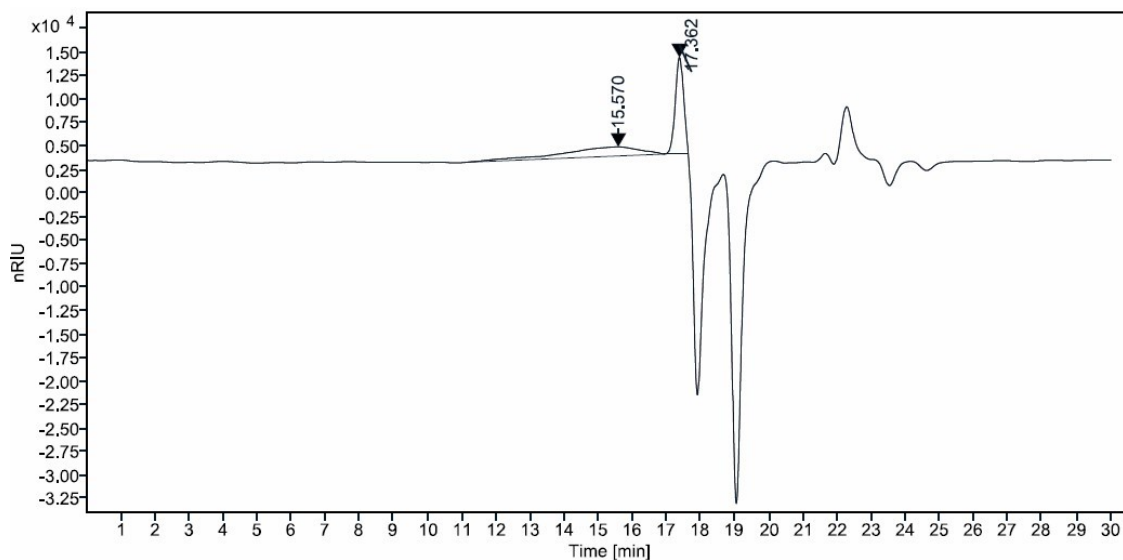

**Figure S14.** SEC trace of entry 6, Table 4.

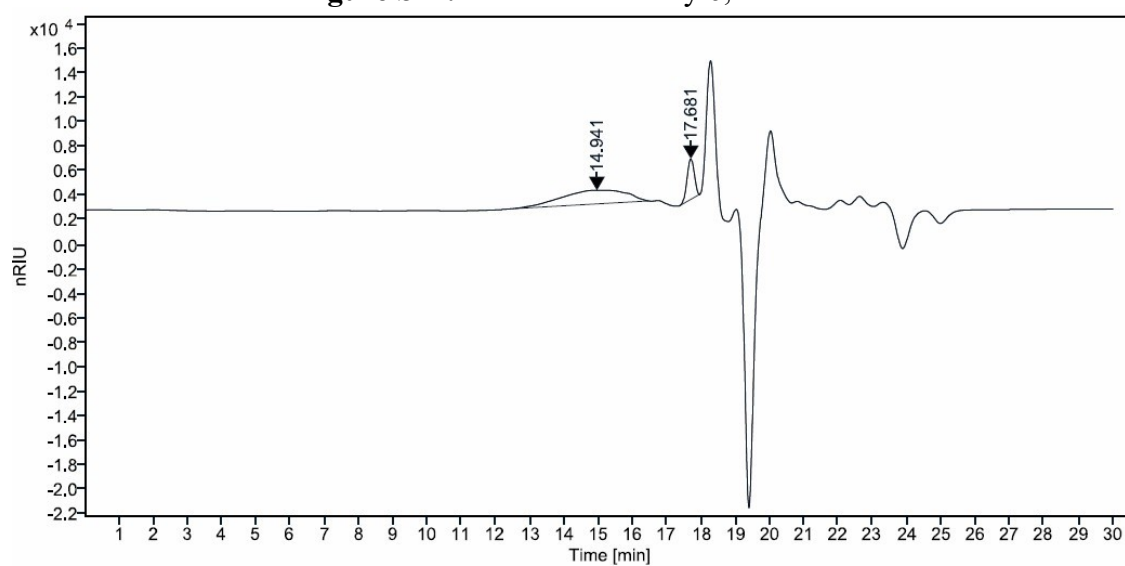

**Figure S15.** SEC trace of entry 7, Table 4.

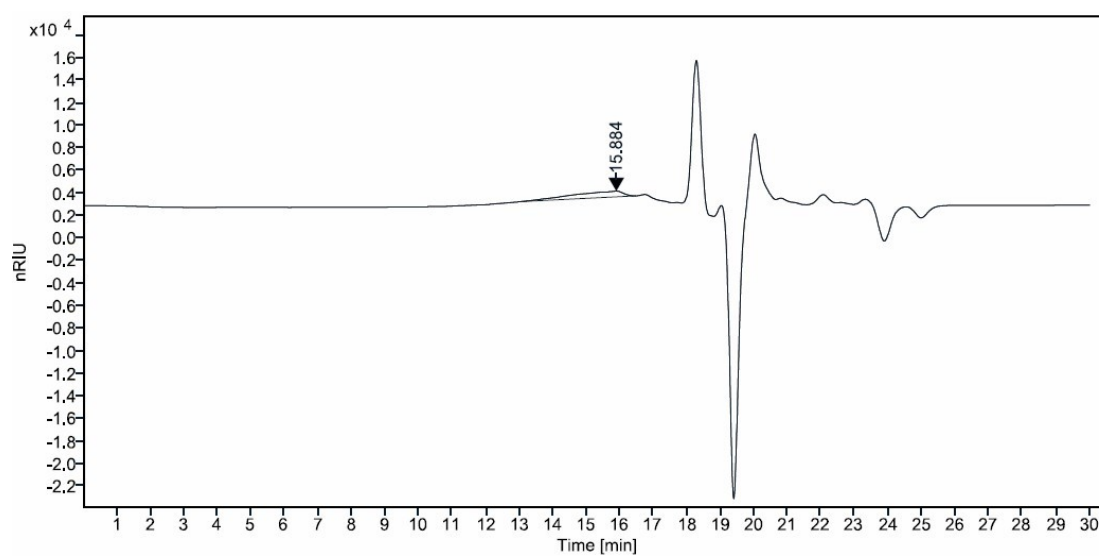

**Figure S16.** SEC trace of entry 8, Table 4.

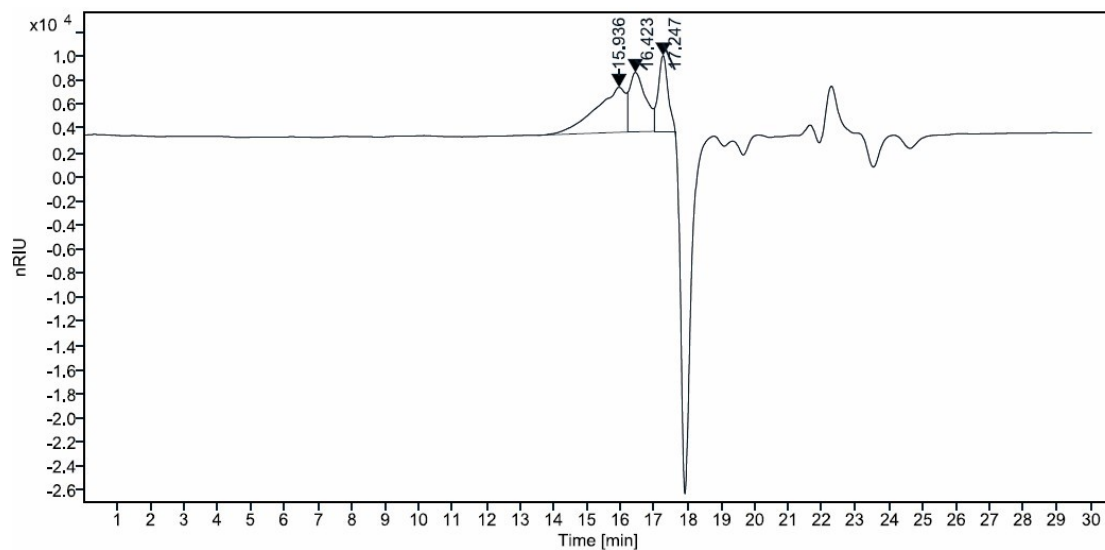

**Figure S17.** SEC trace of entry 9, Table 4.

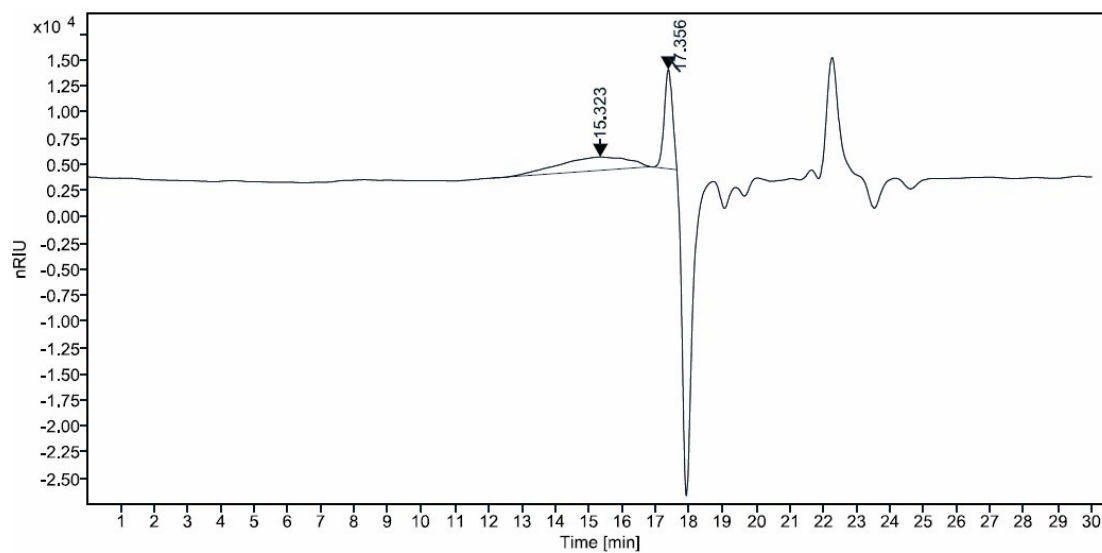

**Figure S18.** SEC trace of entry 10, Table 4.

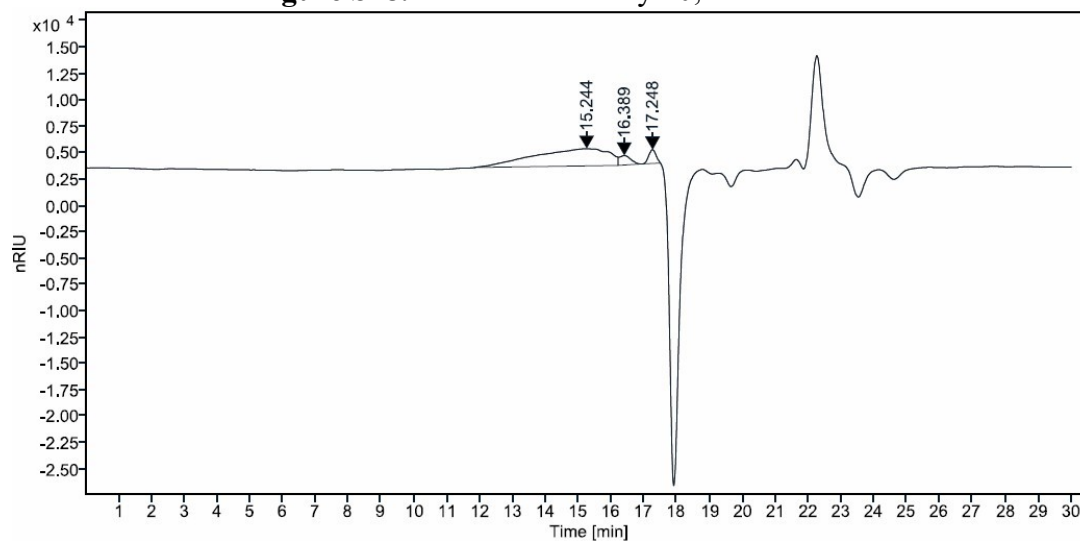

**Figure S19.** SEC trace of entry 11, Table 4.

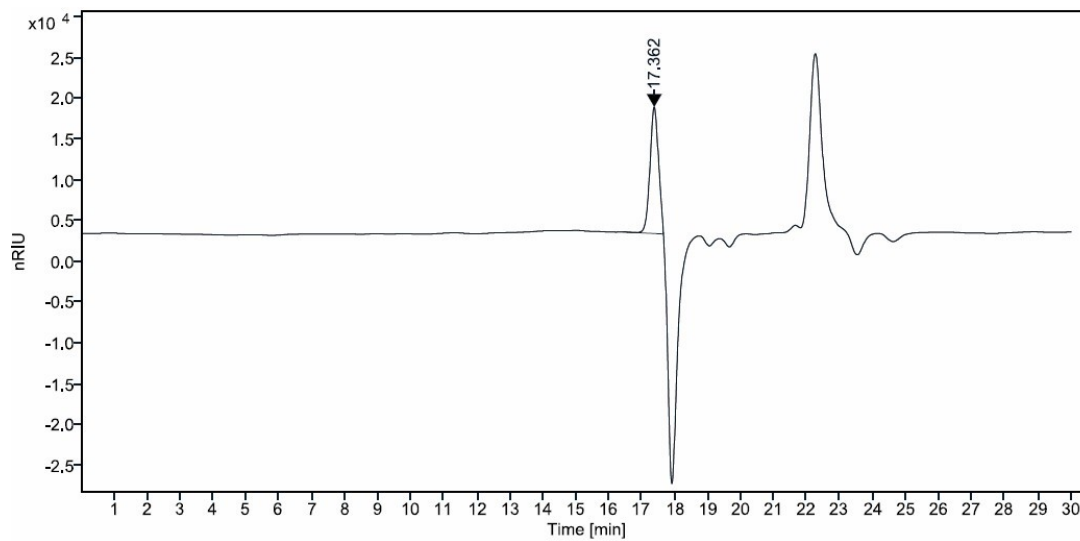

**Figure S20.** SEC trace of entry 12, Table 4.

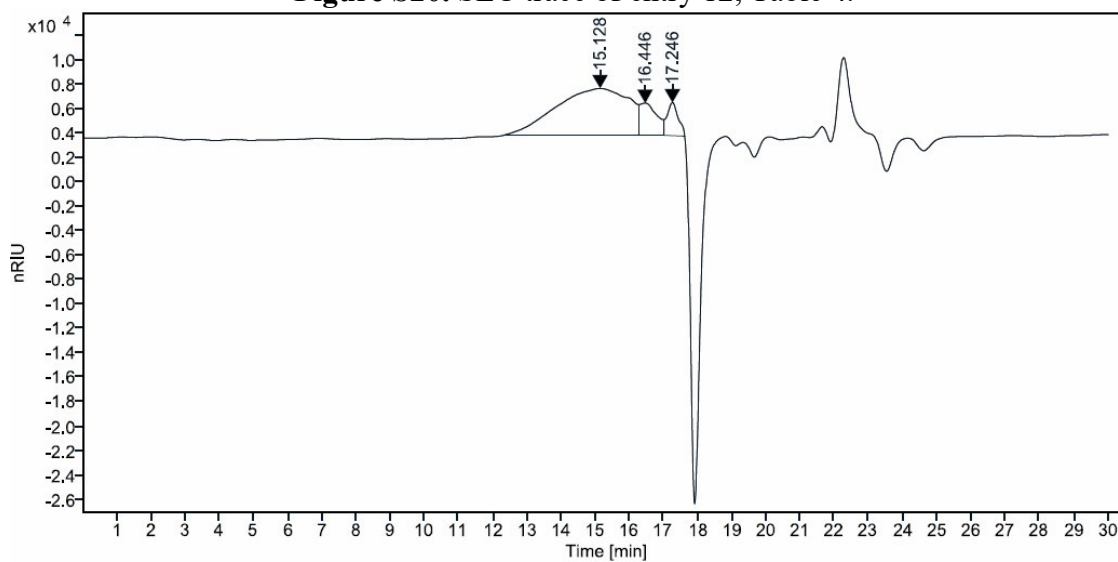

**Figure S21.** SEC trace of entry 13, Table 4.

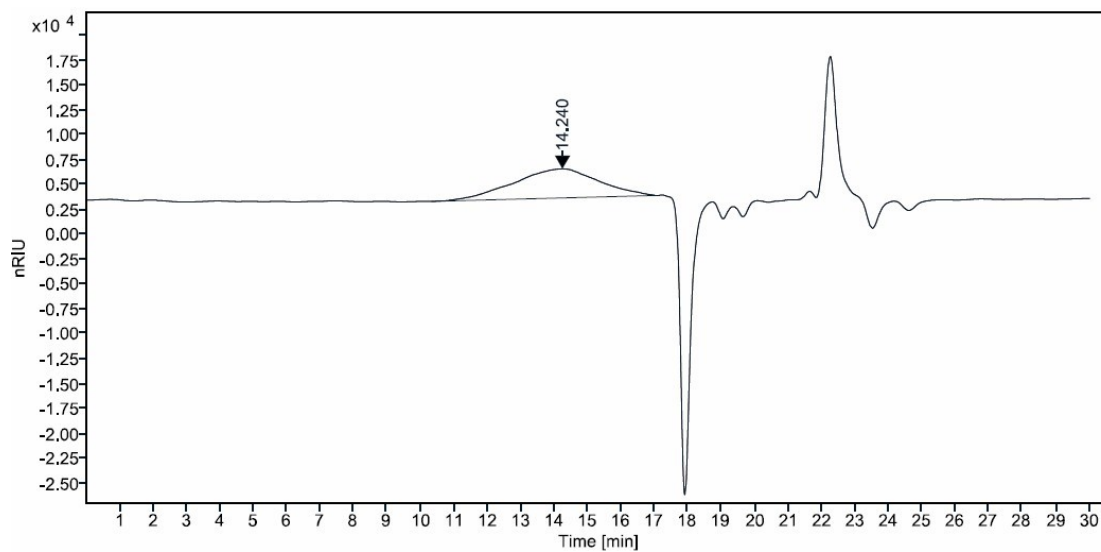

**Figure S22.** SEC trace of entry 14, Table 4.



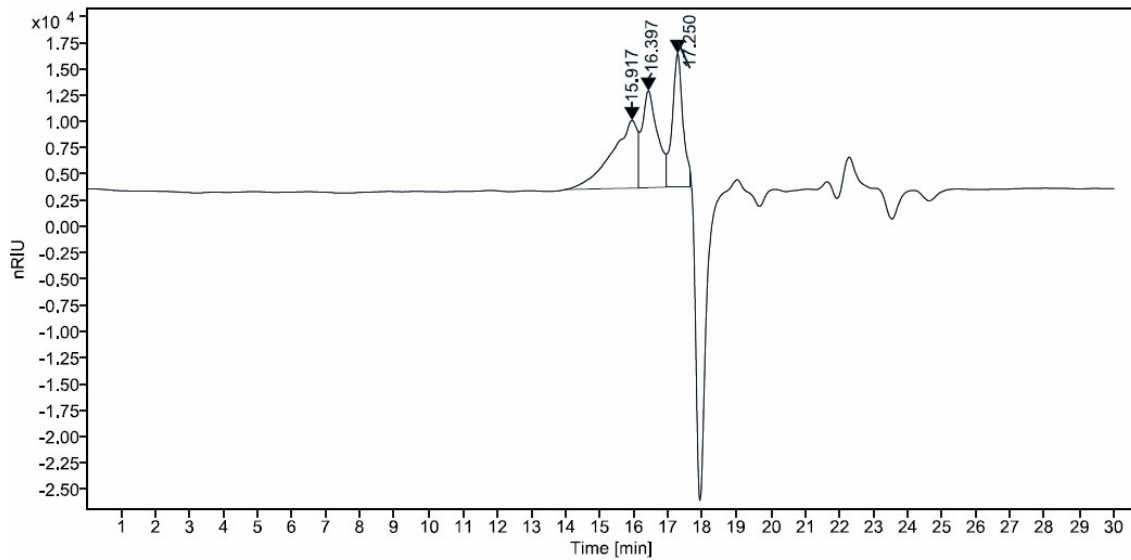

**Figure S23.** SEC trace of entry 15, Table 4.

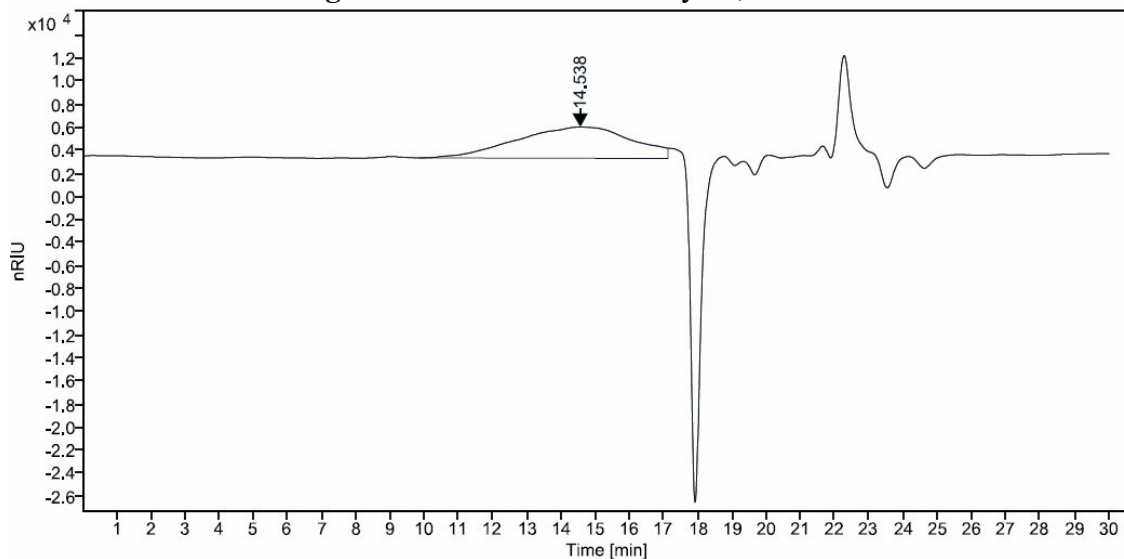

**Figure S24.** SEC trace of entry 16, Table 4.

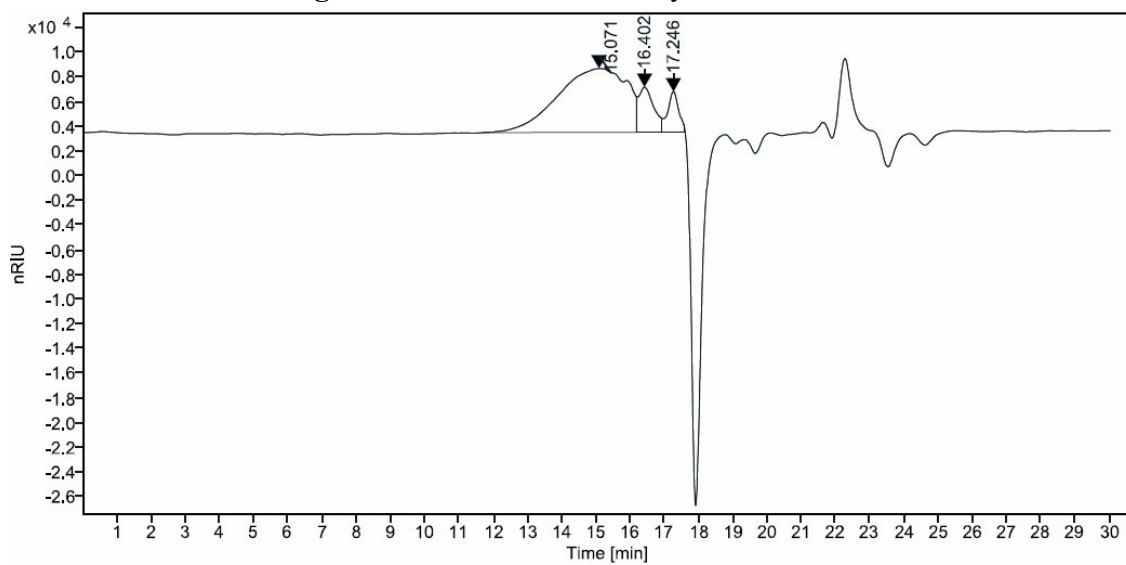

**Figure S25.** SEC trace of entry 17, Table 4.

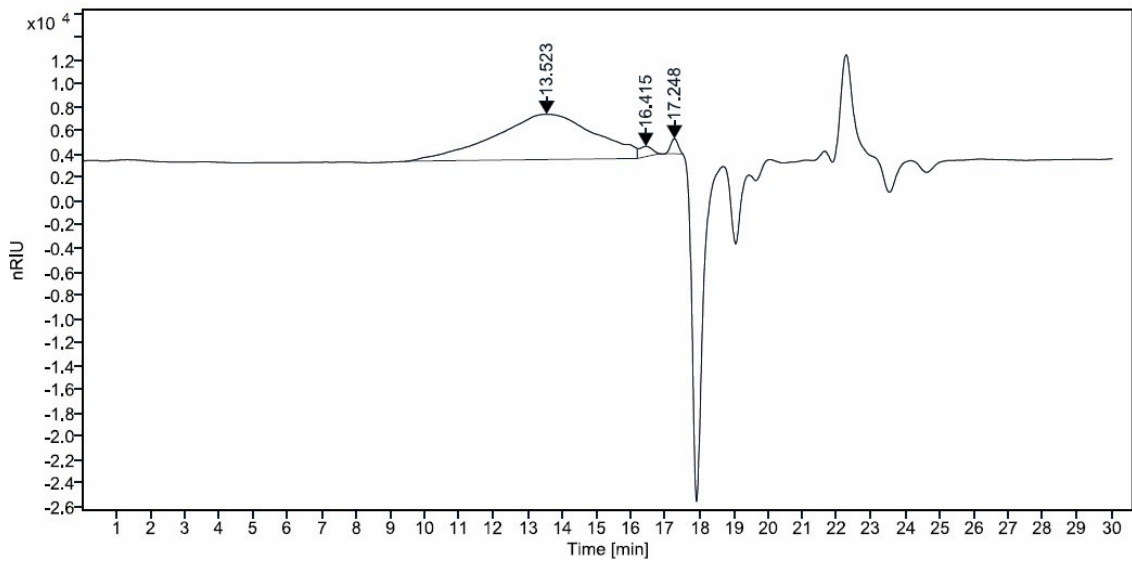

**Figure S26.** SEC trace of entry 18, Table 4.

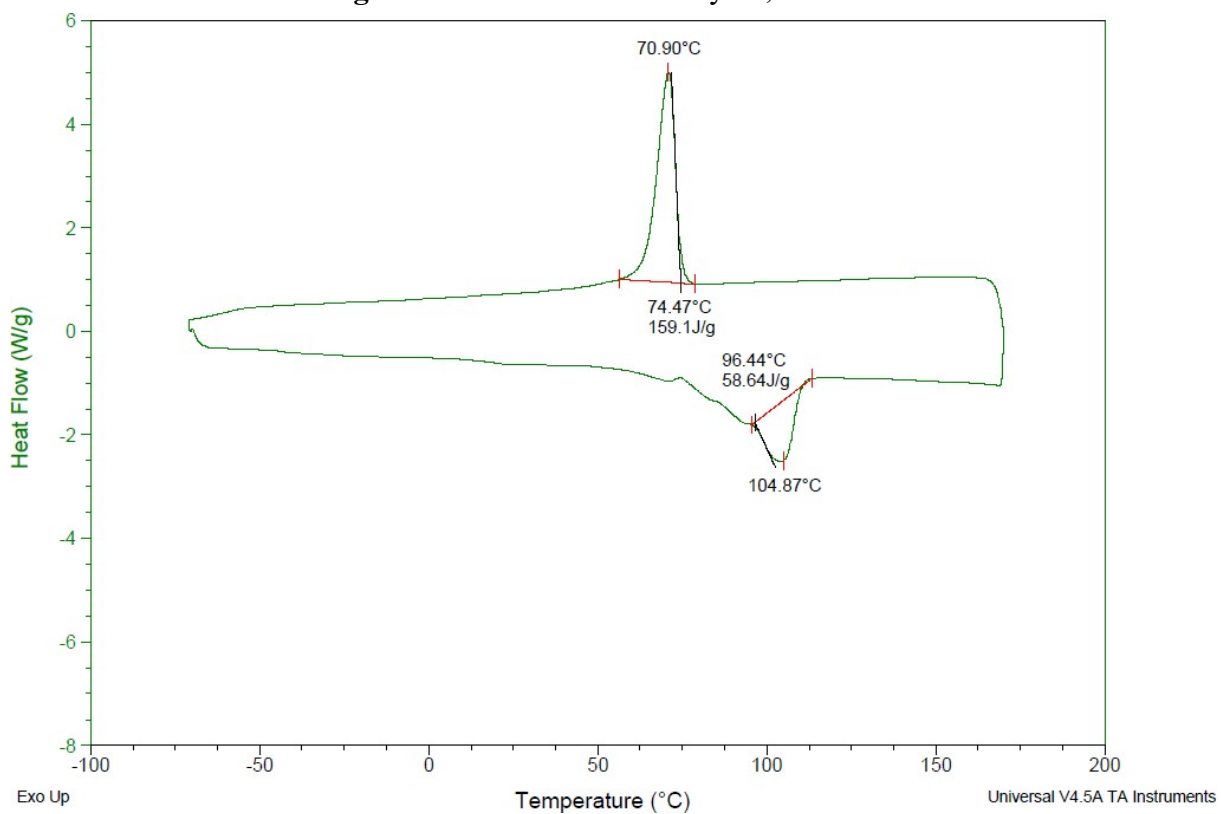

**Figure S27.** DSC thermogram (3<sup>rd</sup> heat cycle) of entry 1, Table 4.

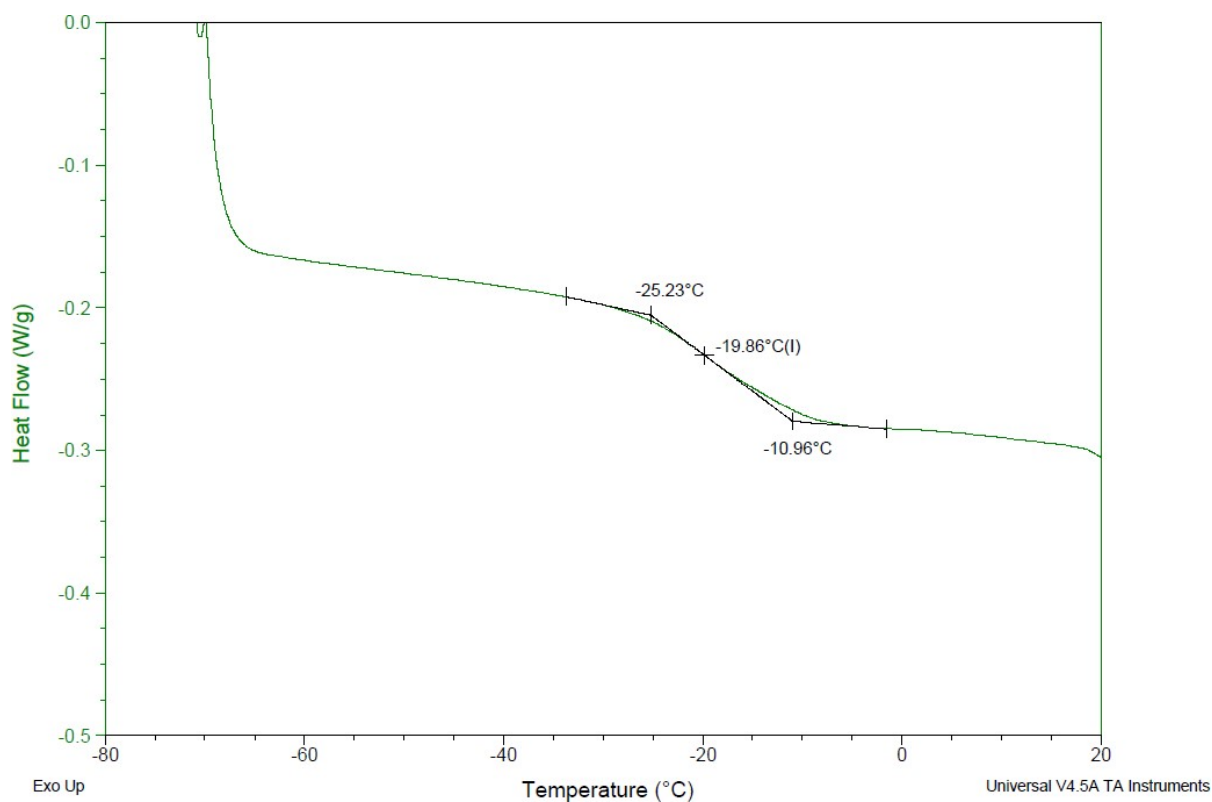

**Figure S28.** DSC thermogram (3<sup>rd</sup> heat cycle) of entry 2, Table 4.

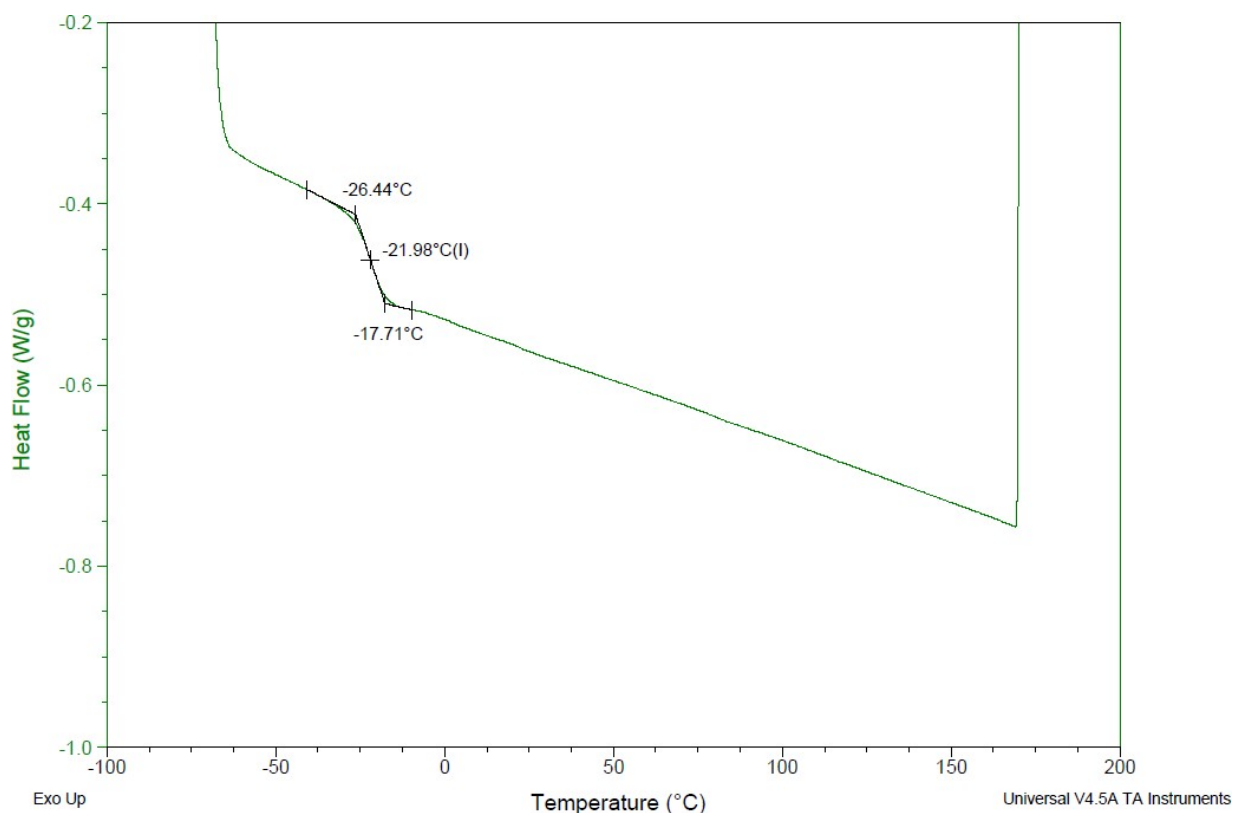

**Figure S29.** DSC thermogram (3<sup>rd</sup> heat cycle) of entry 3, Table 4.

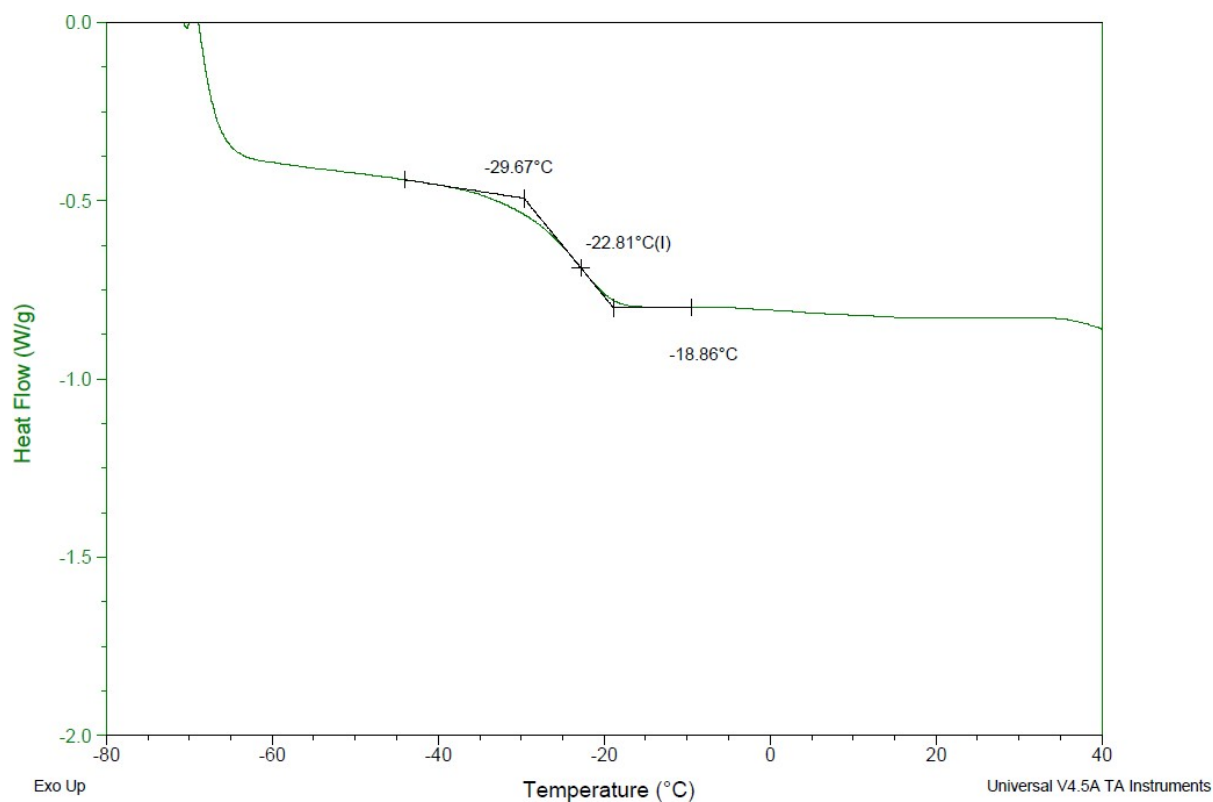

**Figure S30.** DSC thermogram (3<sup>rd</sup> heat cycle) of entry 4, Table 4.

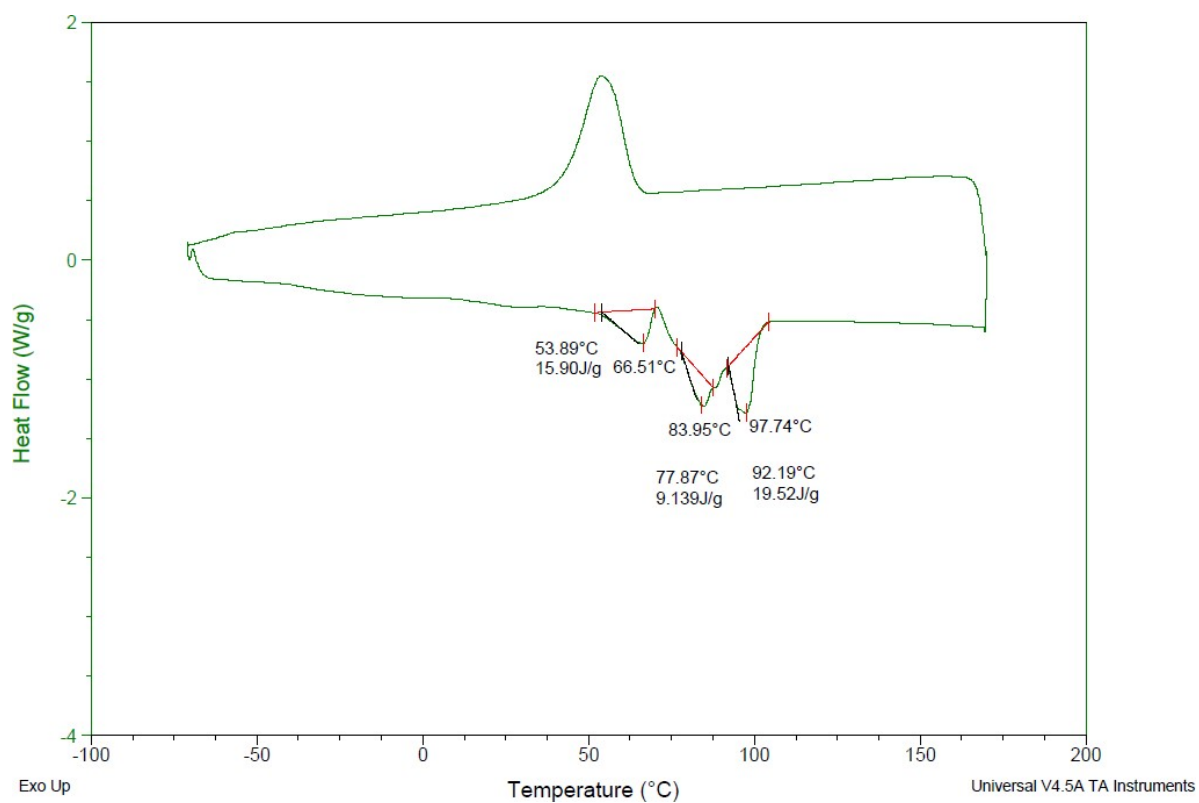

**Figure S31.** DSC thermogram (3<sup>rd</sup> heat cycle) of entry 5, Table 4.

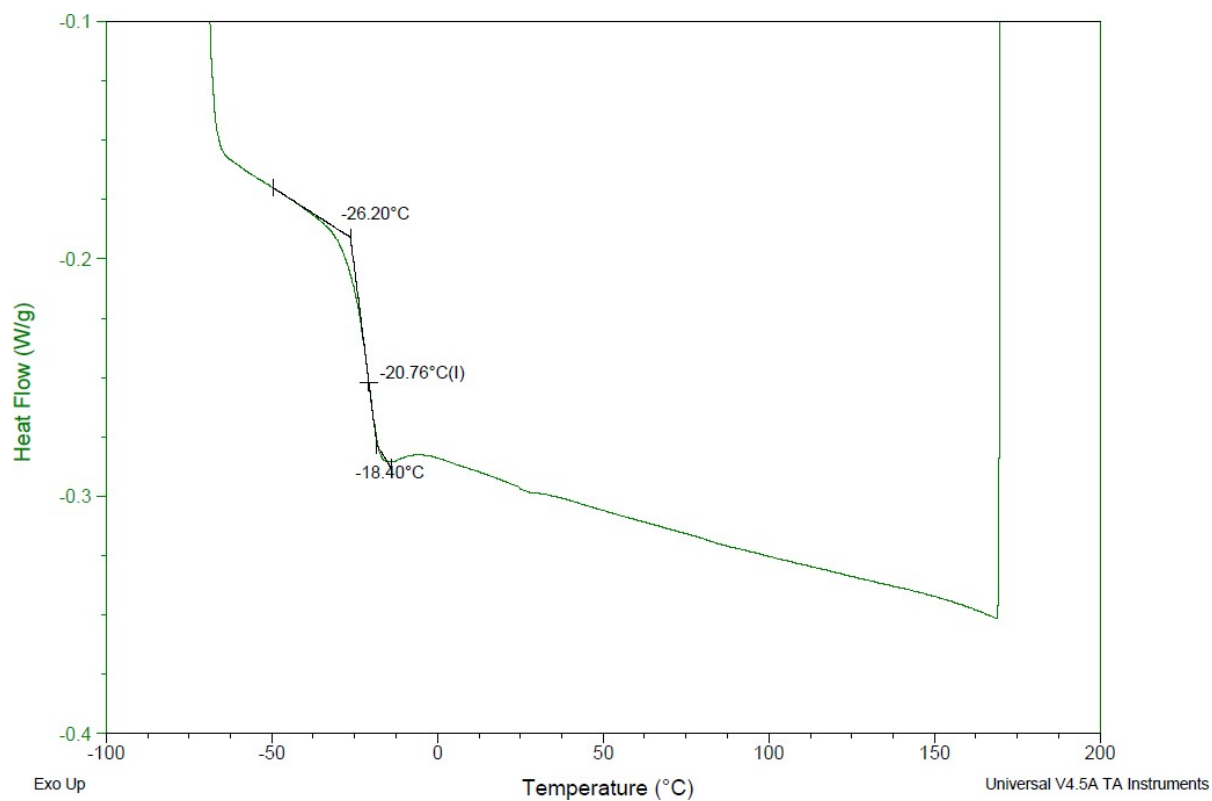

**Figure S32.** DSC thermogram (3<sup>rd</sup> heat cycle) of entry 6, Table 4.

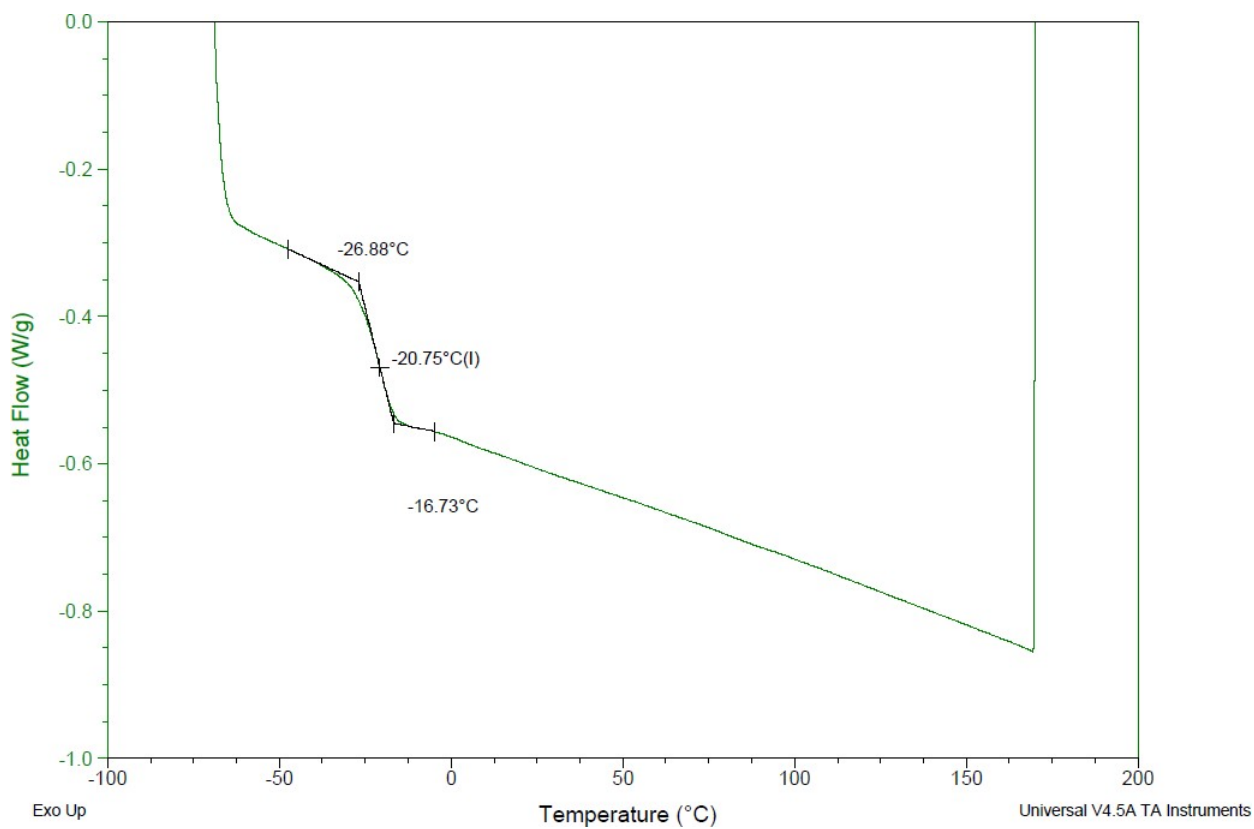

**Figure S33.** DSC thermogram (3<sup>rd</sup> heat cycle) of entry 7, Table 4.

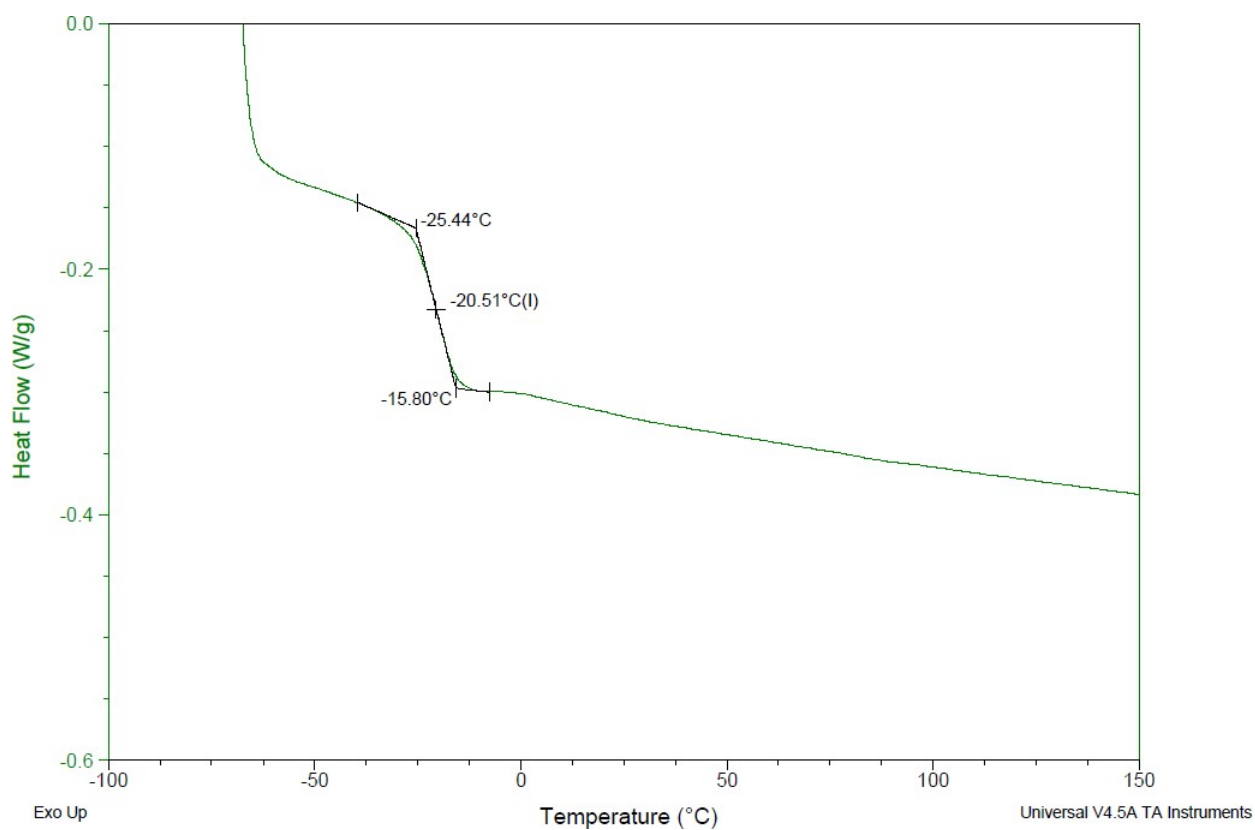

**Figure S34.** DSC thermogram (3<sup>rd</sup> heat cycle) of entry 8, Table 4.

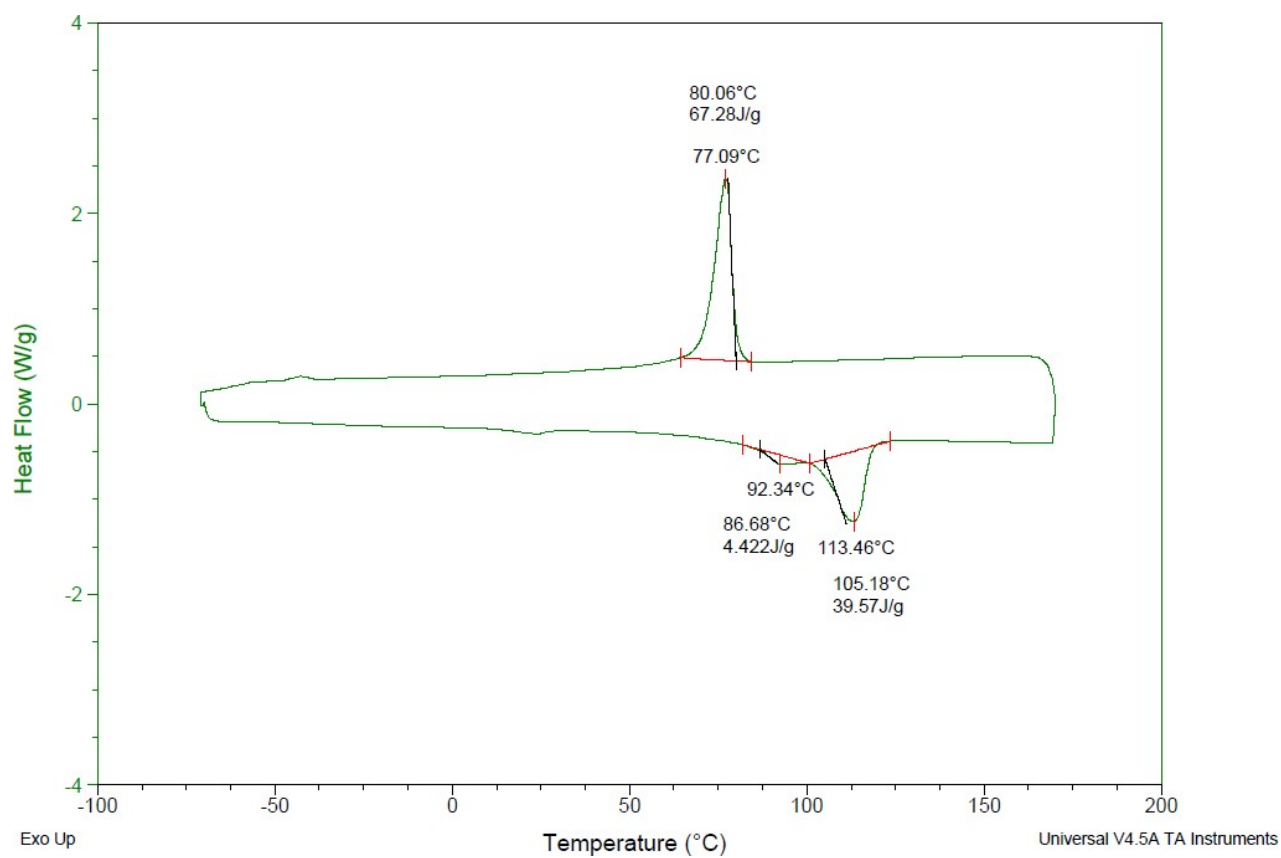

**Figure S35.** DSC thermogram (3<sup>rd</sup> heat cycle) of entry 9, Table 4.

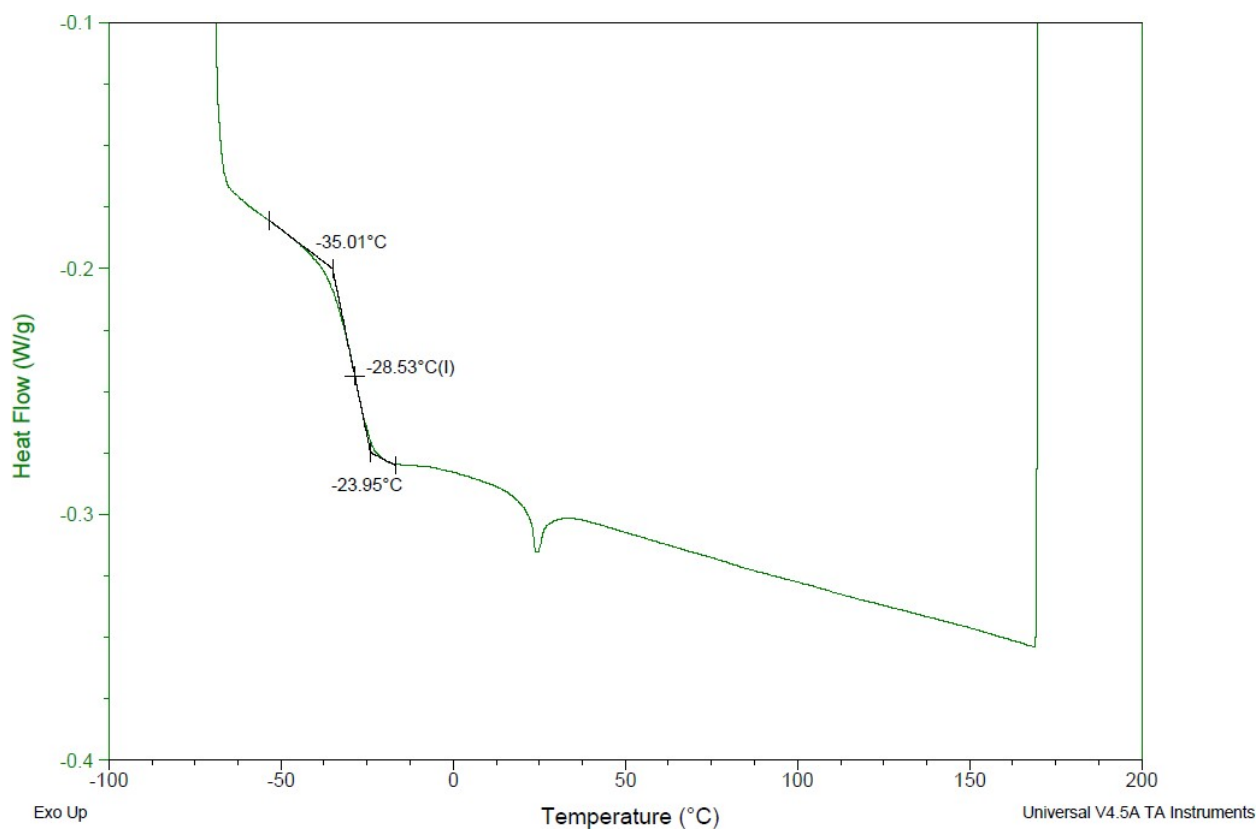

**Figure S36.** DSC thermogram (3<sup>rd</sup> heat cycle) of entry 10, Table 4.

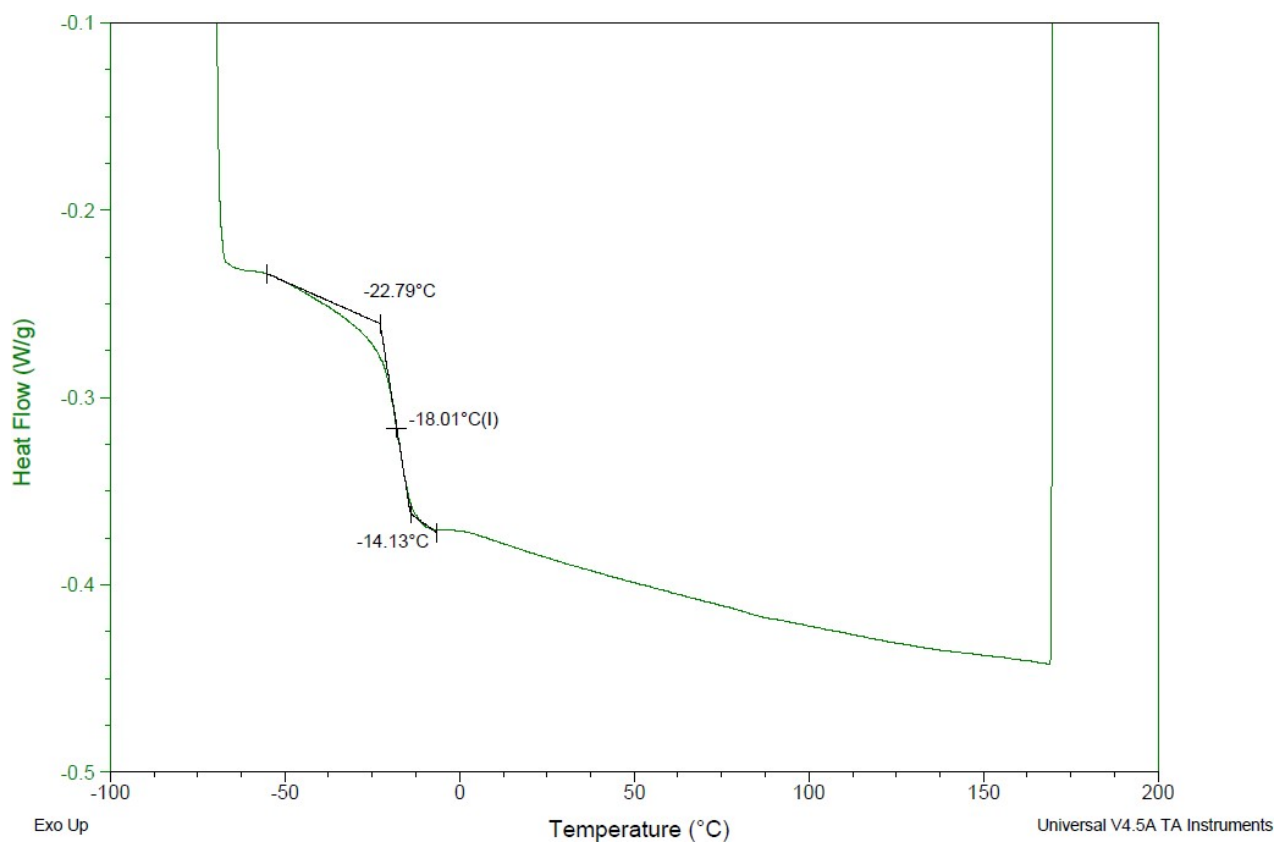

**Figure S37.** DSC thermogram (3<sup>rd</sup> heat cycle) of entry 11, Table 4.

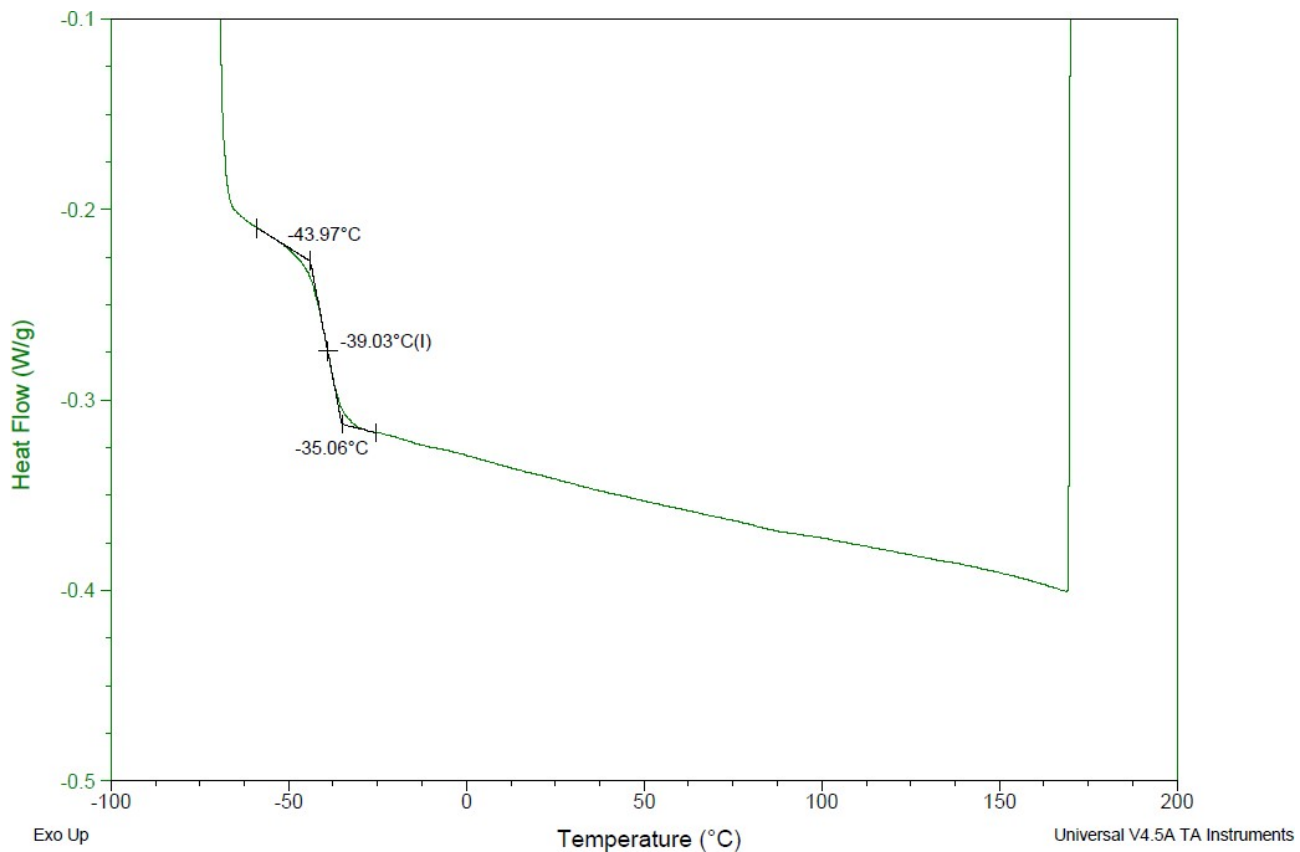

**Figure S38.** DSC thermogram (3<sup>rd</sup> heat cycle) of entry 12, Table 4.

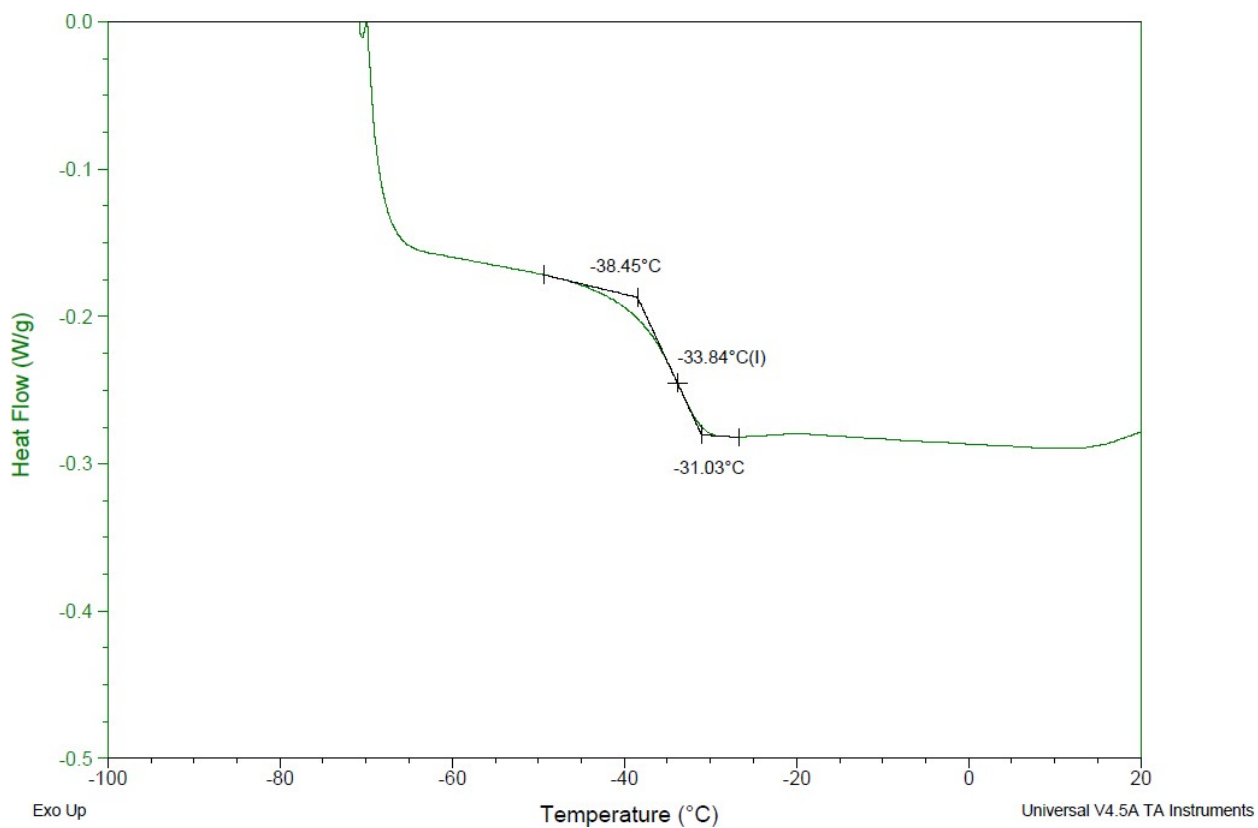

**Figure S39.** DSC thermogram (3<sup>rd</sup> heat cycle) of entry 13, Table 4.



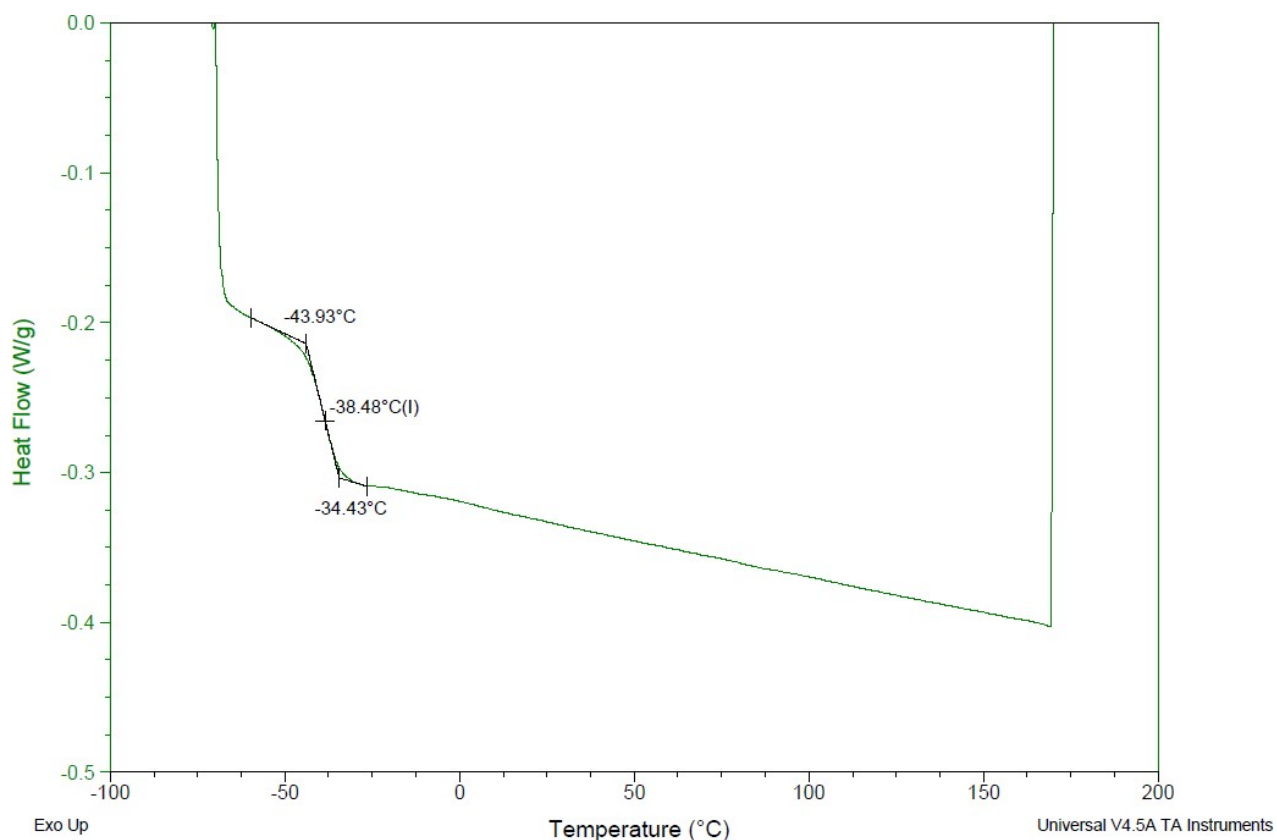

**Figure S40.** DSC thermogram (3<sup>rd</sup> heat cycle) of entry 14, Table 4.

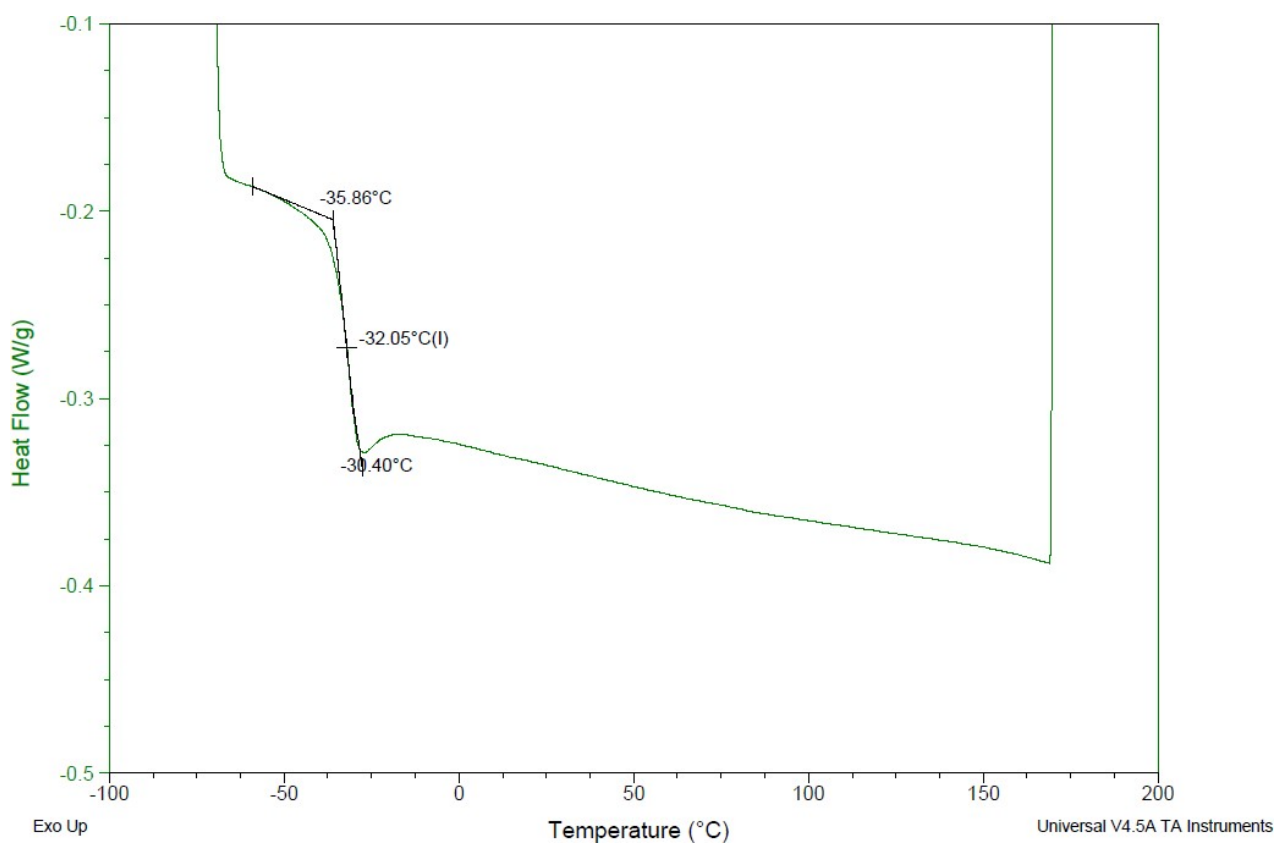

**Figure S41.** DSC thermogram (3<sup>rd</sup> heat cycle) of entry 15, Table 4.

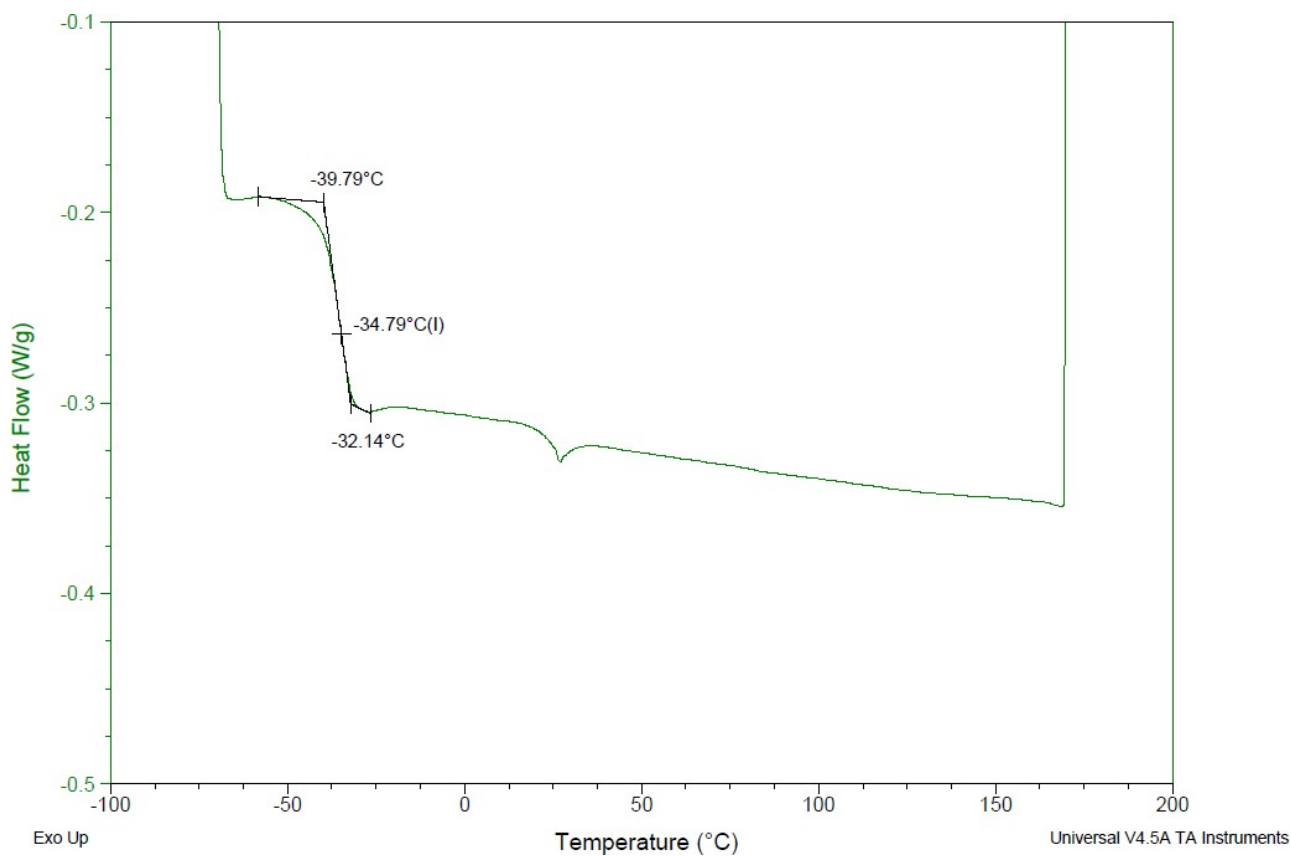

**Figure S42.** DSC thermogram (3<sup>rd</sup> heat cycle) of entry 16, Table 4.

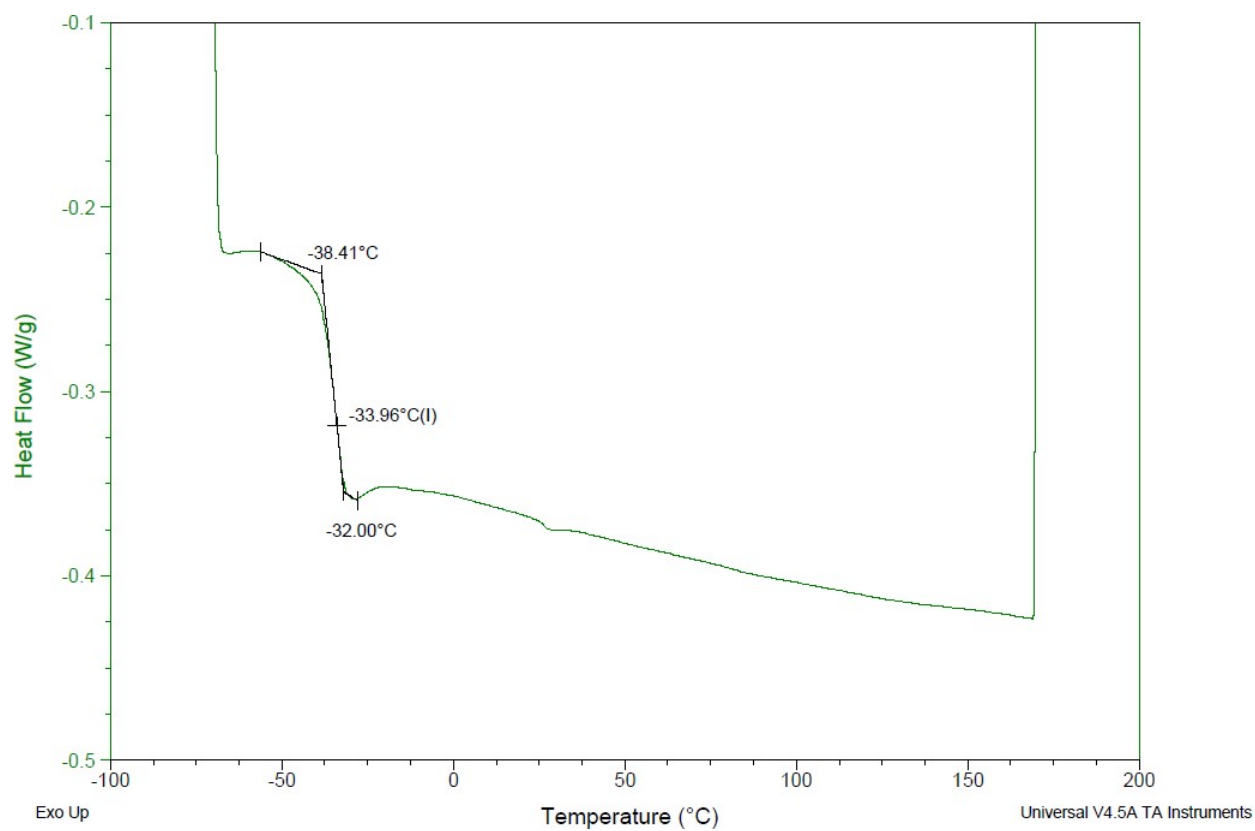

**Figure S43.** DSC thermogram (3<sup>rd</sup> heat cycle) of entry 17, Table 4.

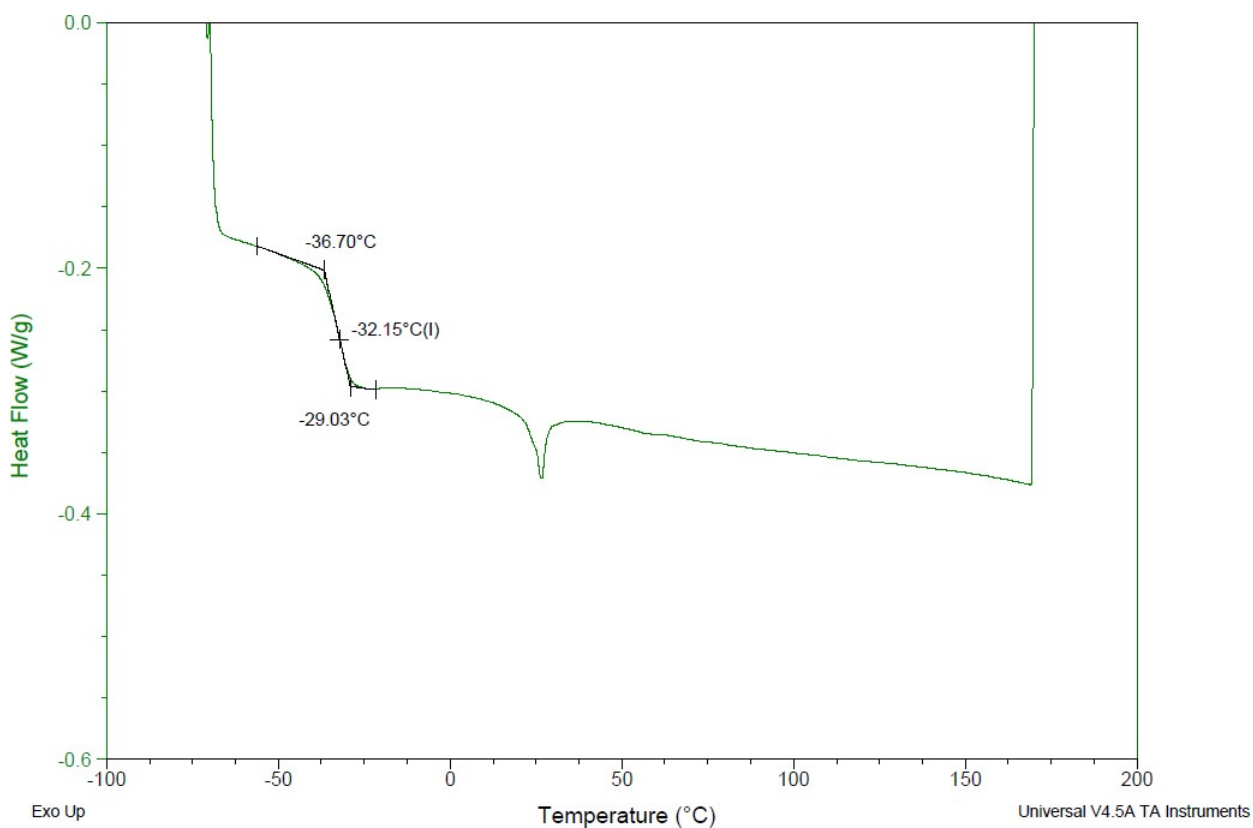

**Figure S44.** DSC thermogram (3<sup>rd</sup> heat cycle) of entry 18, Table 4.

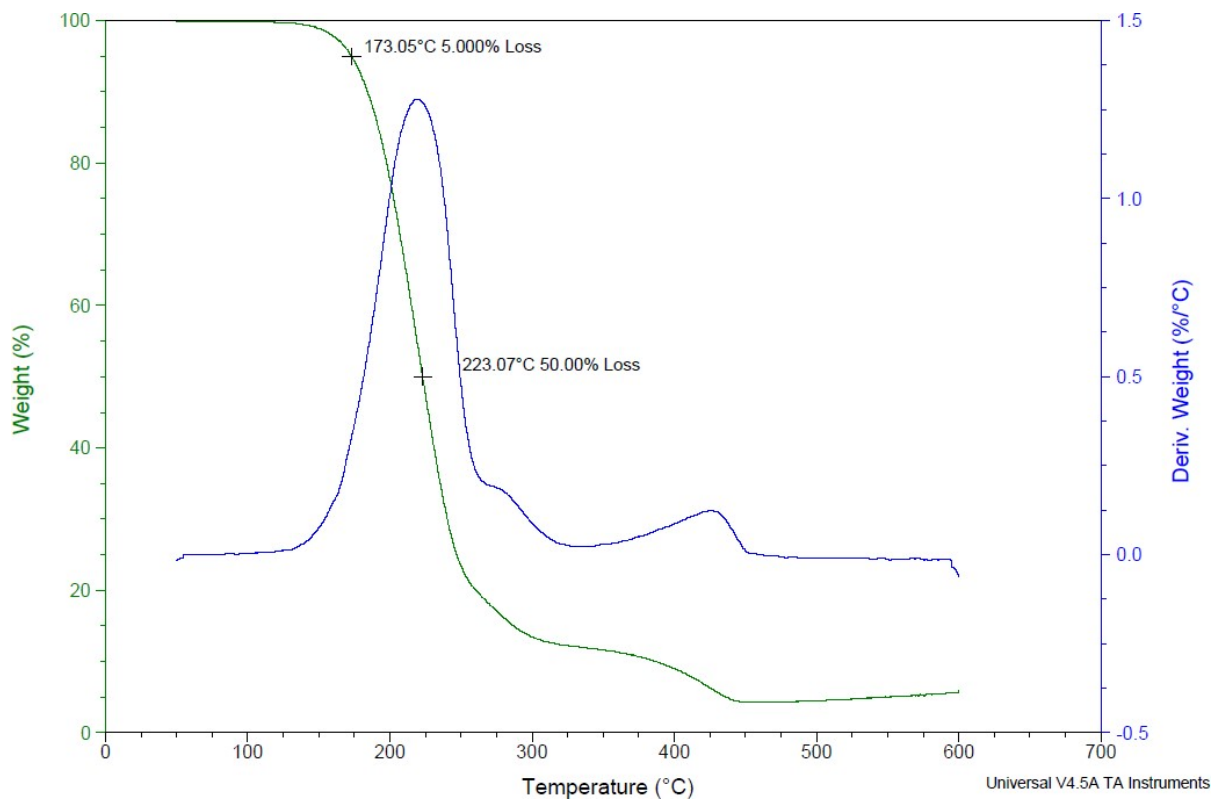

**Figure S45.** TGA thermogram of entry 1, Table 4.

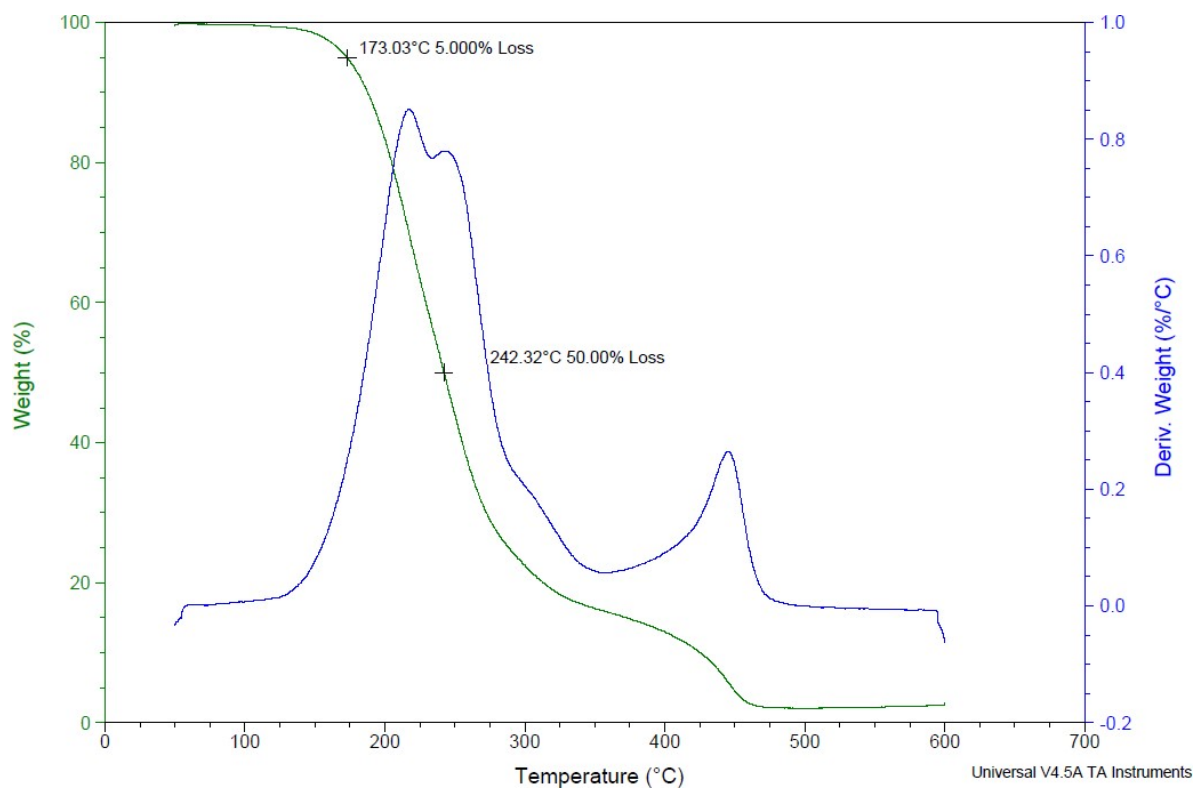

**Figure S46.** TGA thermogram of entry 2, Table 4.

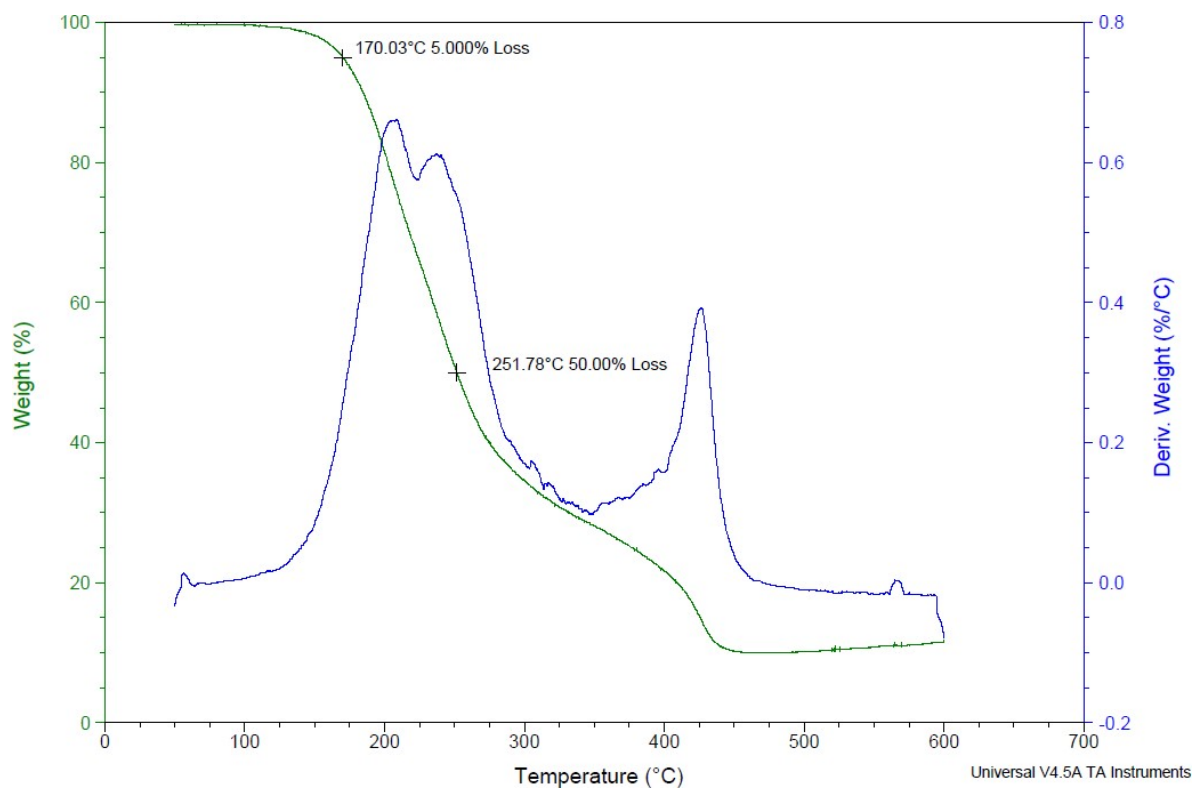

**Figure S47.** TGA thermogram of entry 3, Table 4.

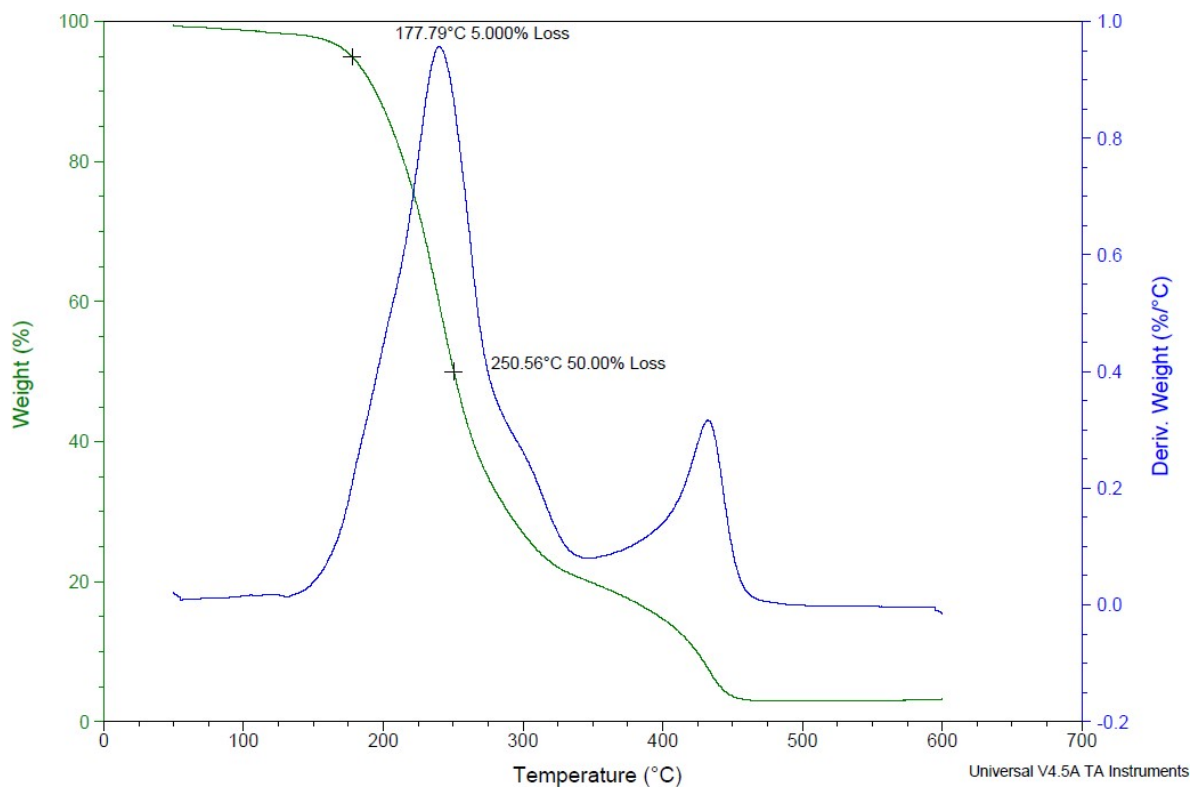

**Figure S48.** TGA thermogram of entry 4, Table 4.

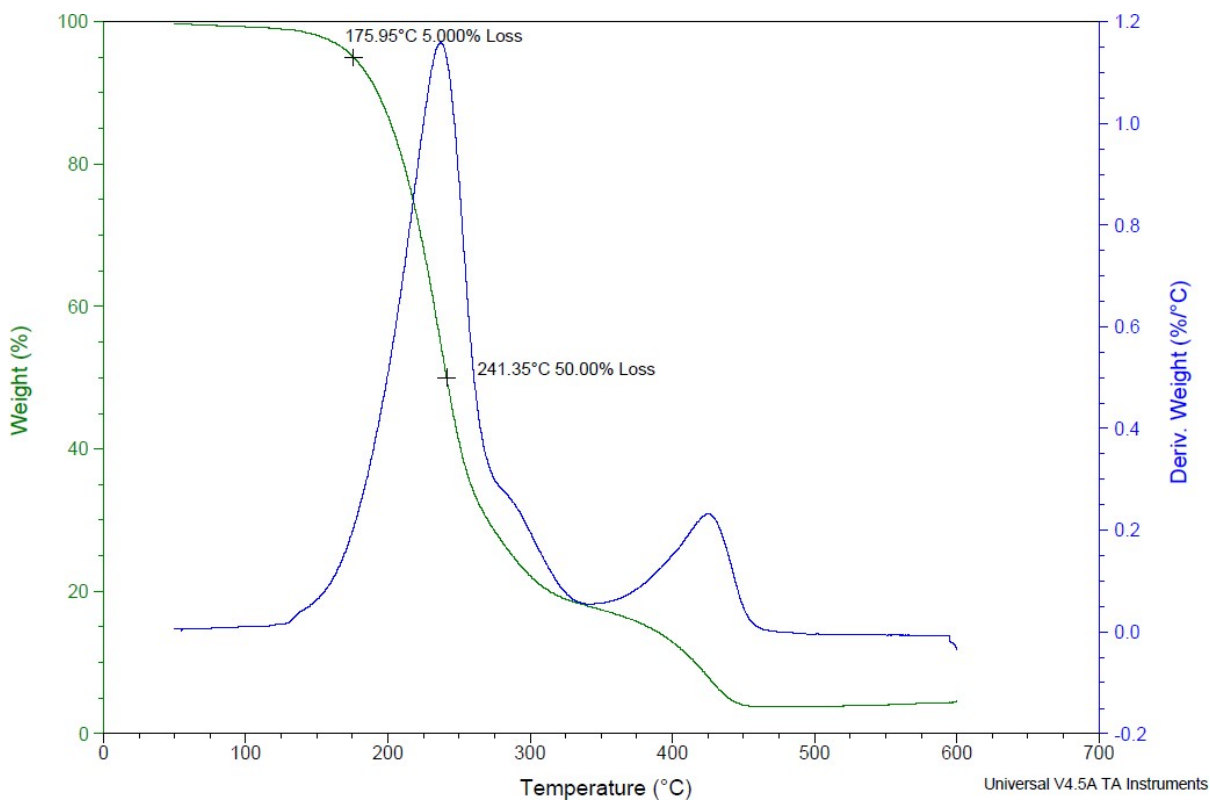

**Figure S49.** TGA thermogram of entry 5, Table 4.

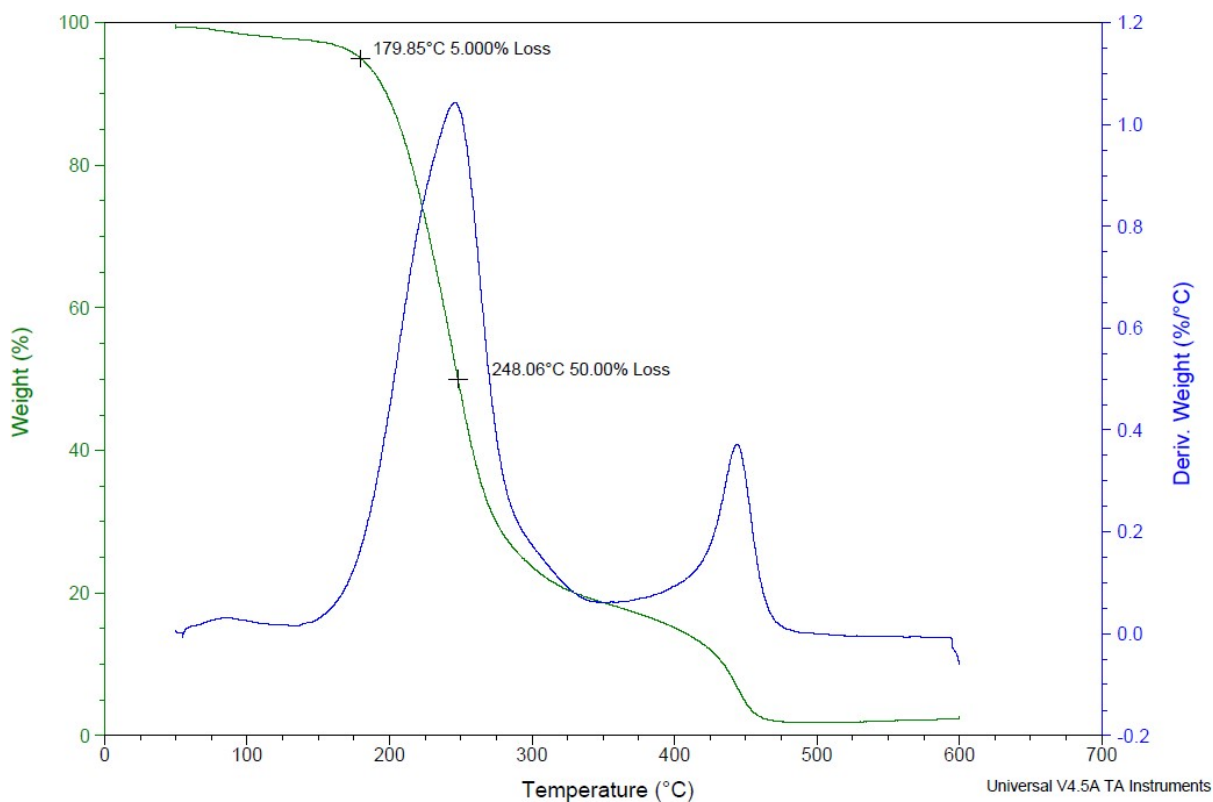

**Figure S50.** TGA thermogram of entry 6, Table 4.

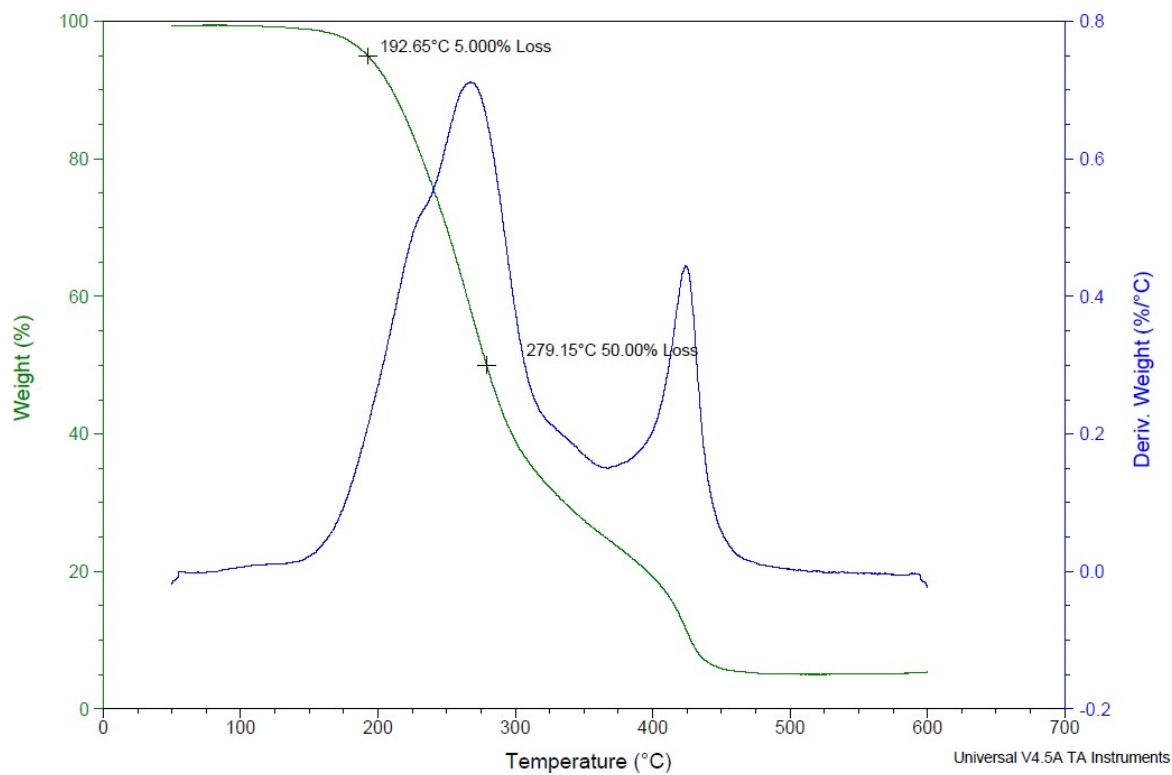

**Figure S51.** TGA thermogram of entry 7, Table 4.

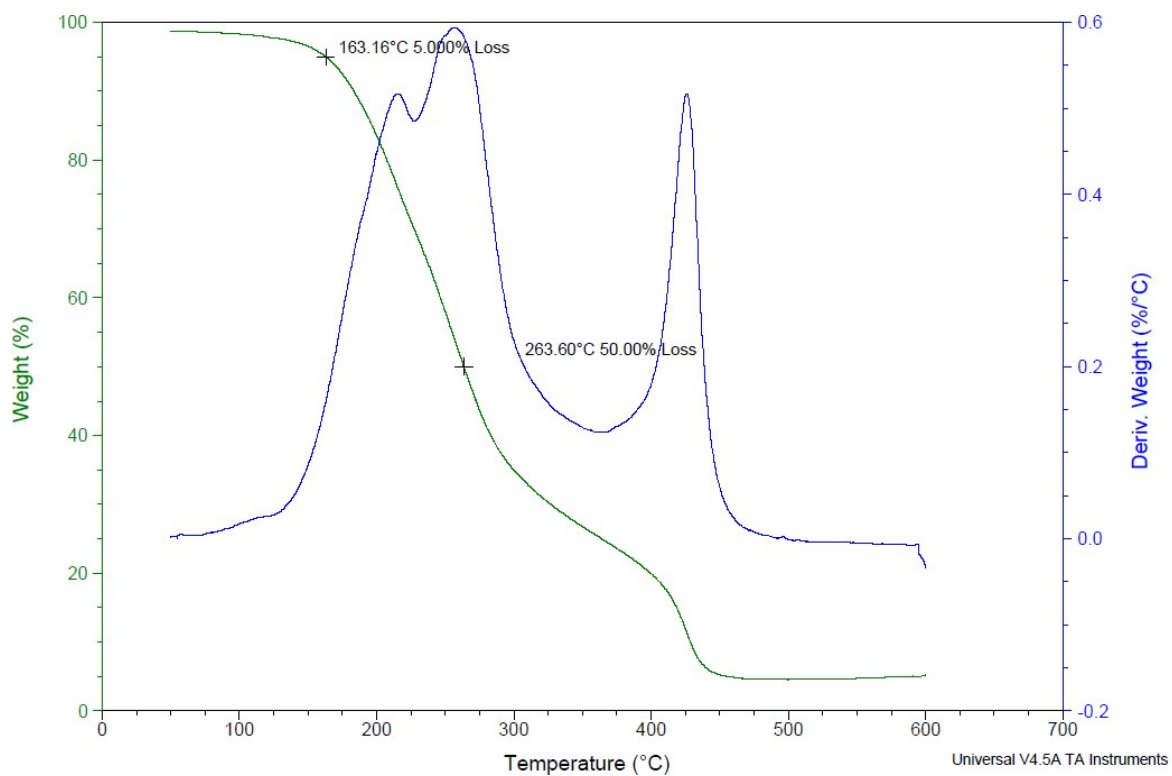

**Figure S52.** TGA thermogram of entry 8, Table 4.

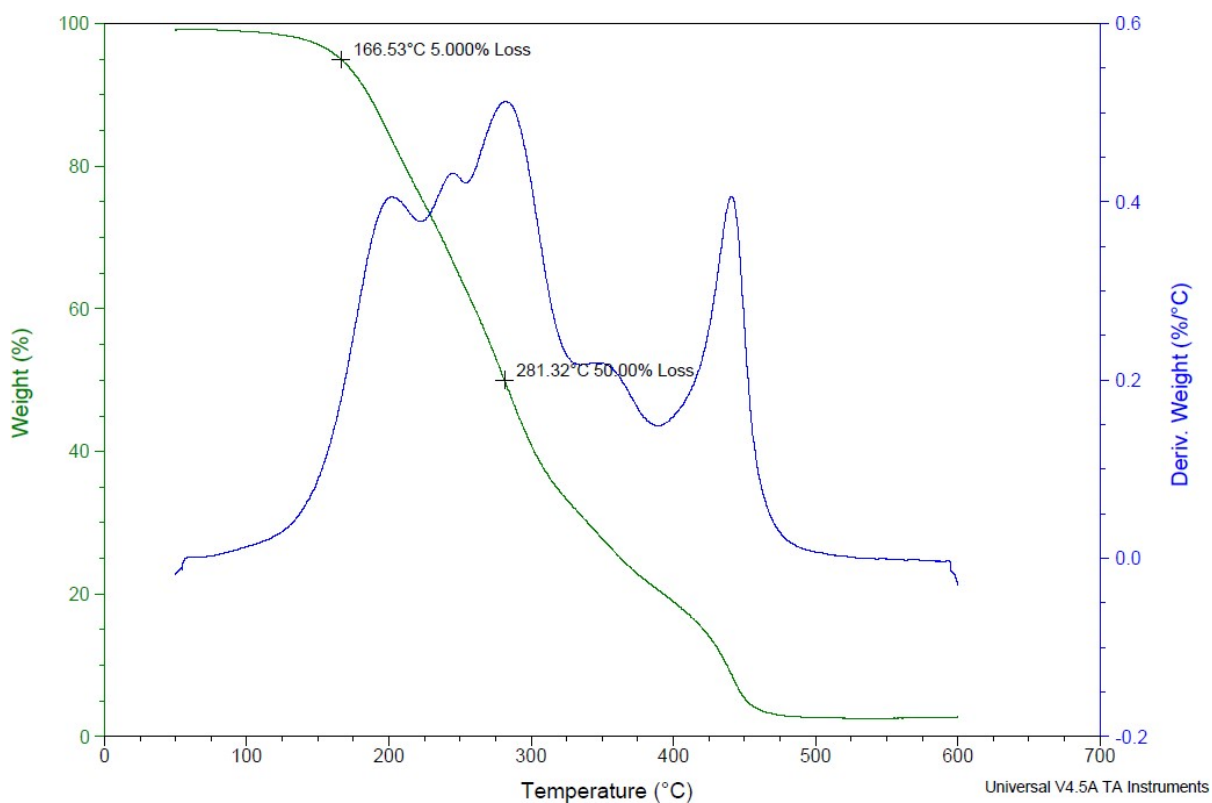

**Figure S53.** TGA thermogram of entry 9, Table 4.

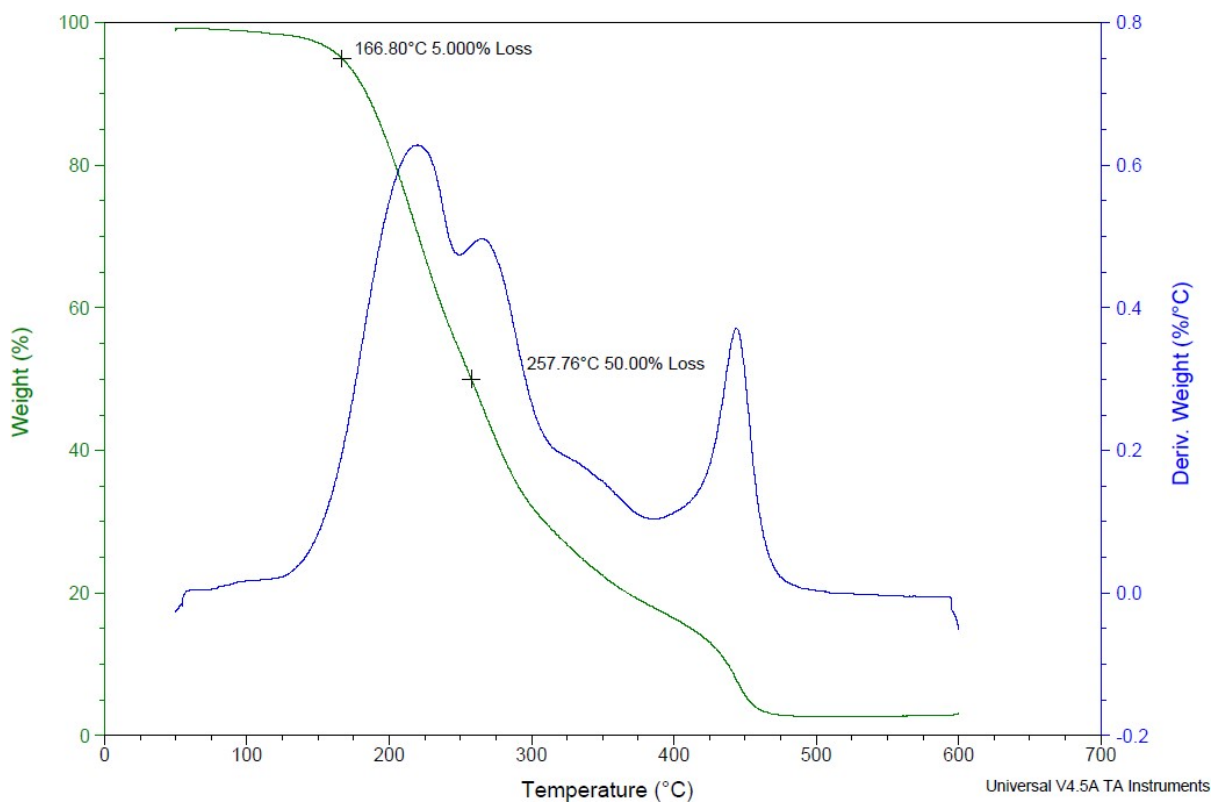

**Figure S54.** TGA thermogram of entry 10, Table 4.

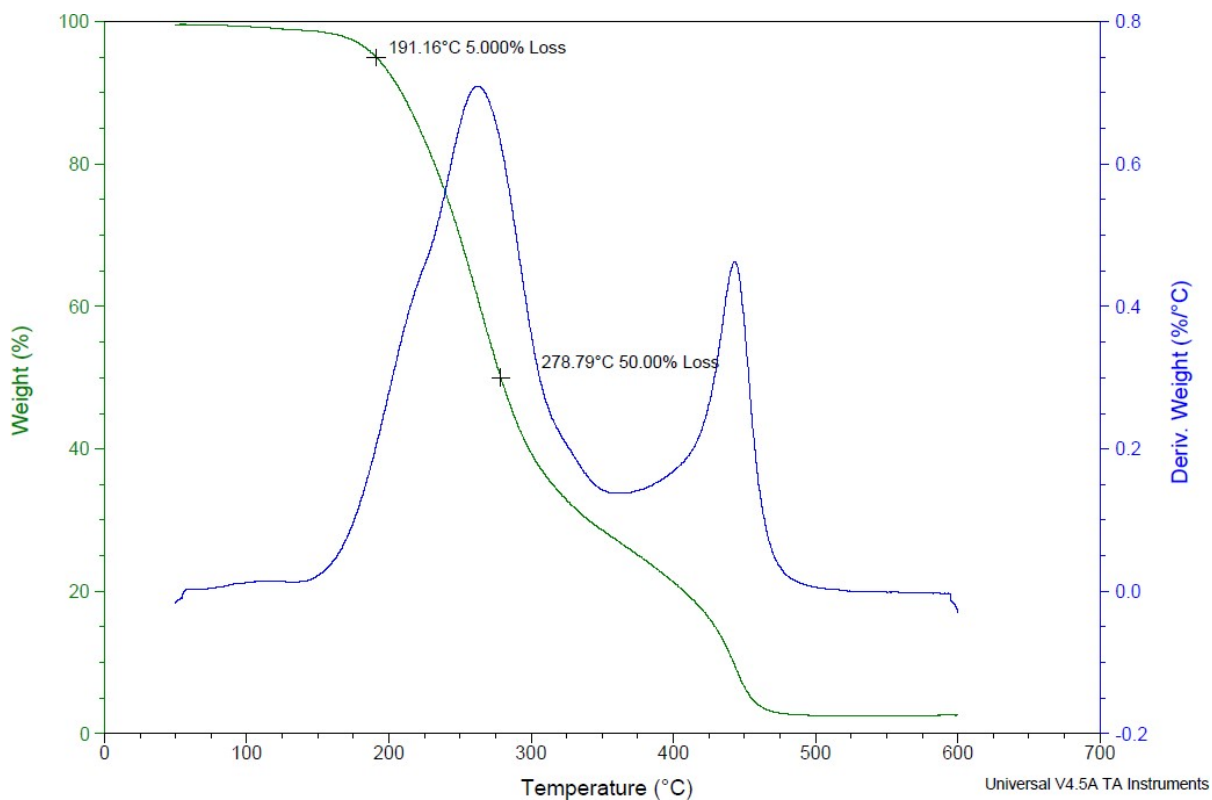

**Figure S55.** TGA thermogram of entry 11, Table 4.



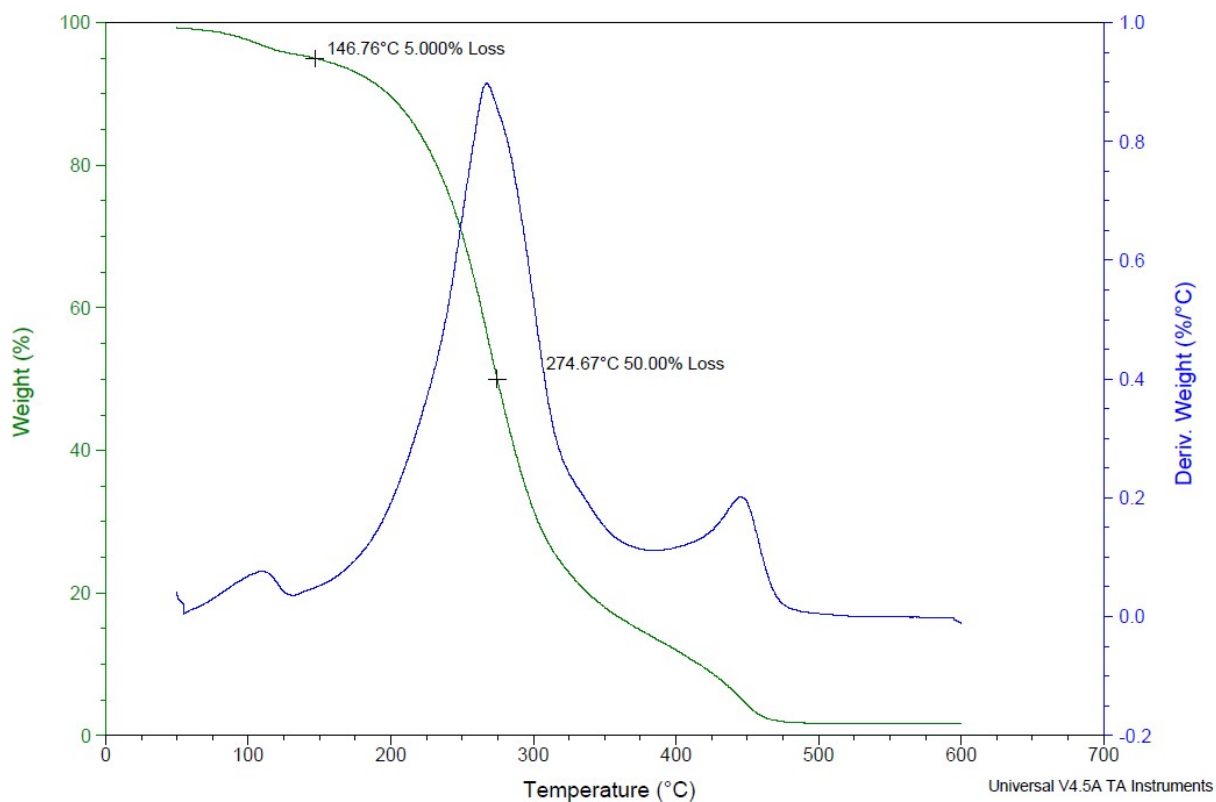

**Figure S56.** TGA thermogram of entry 12, Table 4.

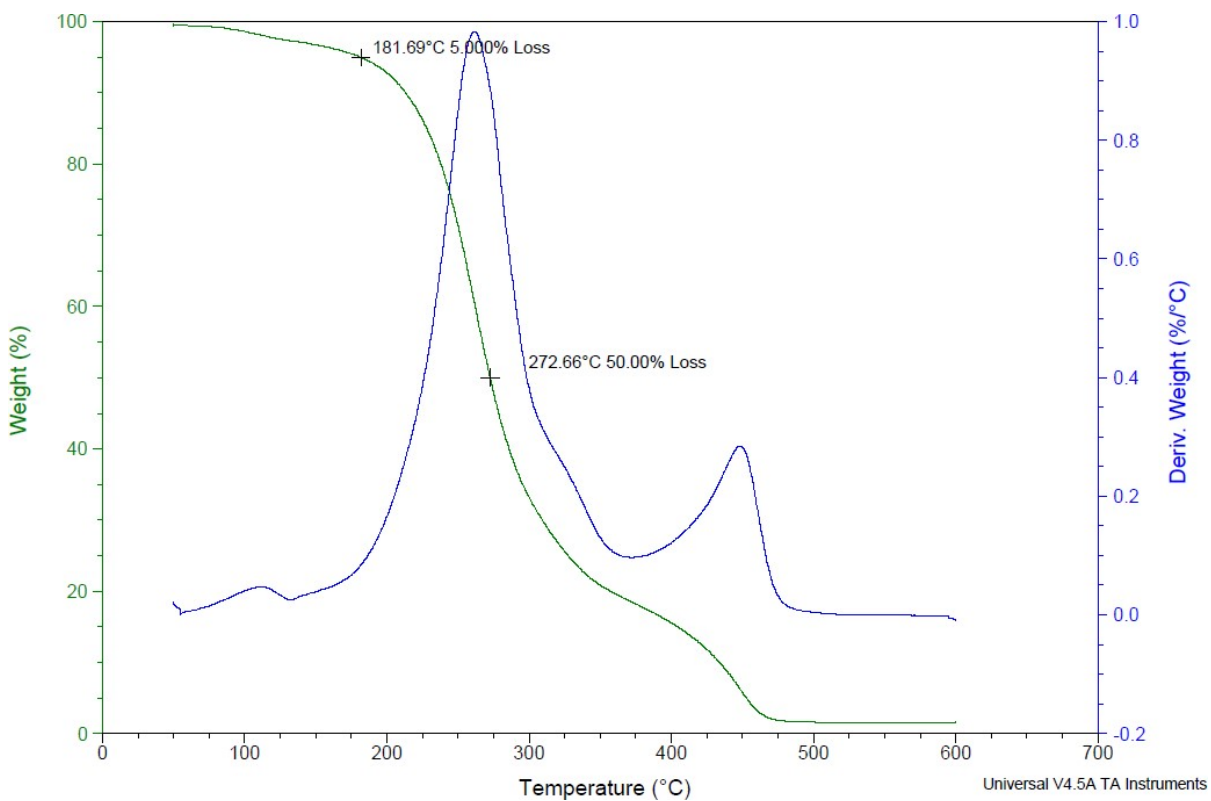

**Figure S57.** TGA thermogram of entry 13, Table 4.

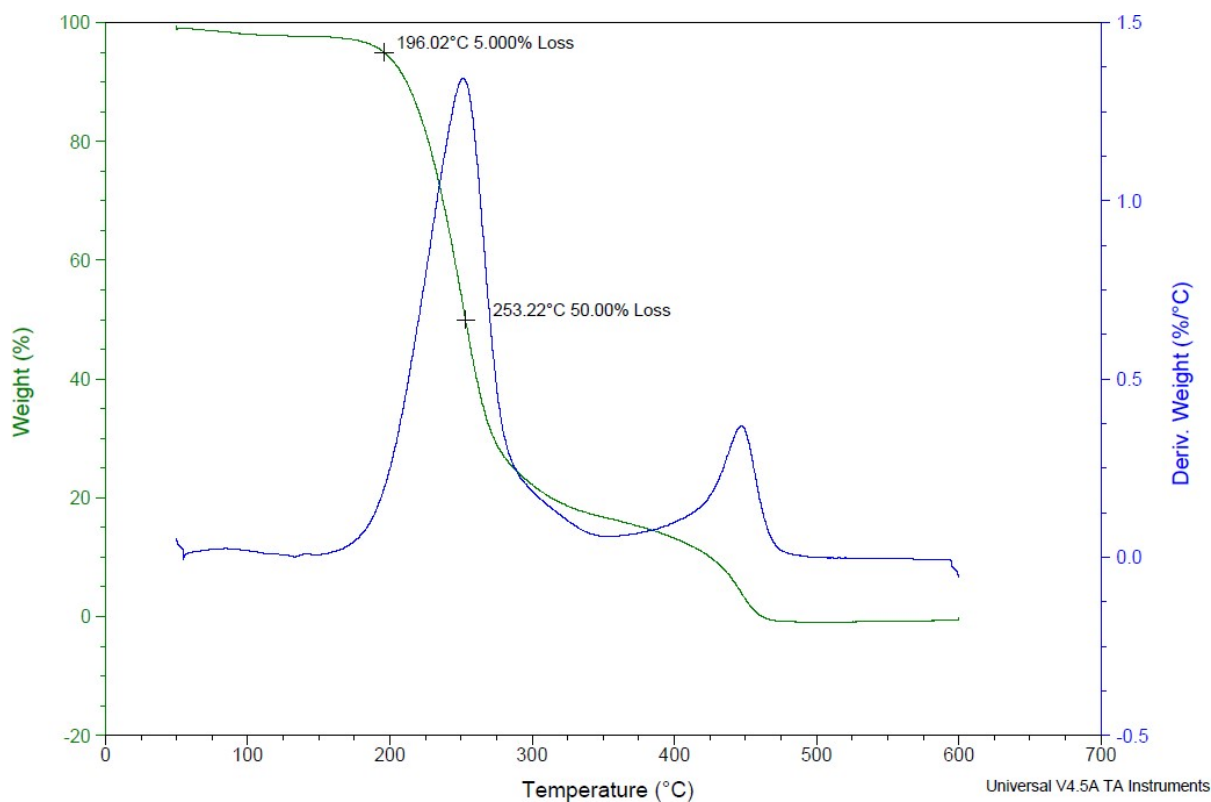

**Figure S58.** TGA thermogram of entry 14, Table 4.

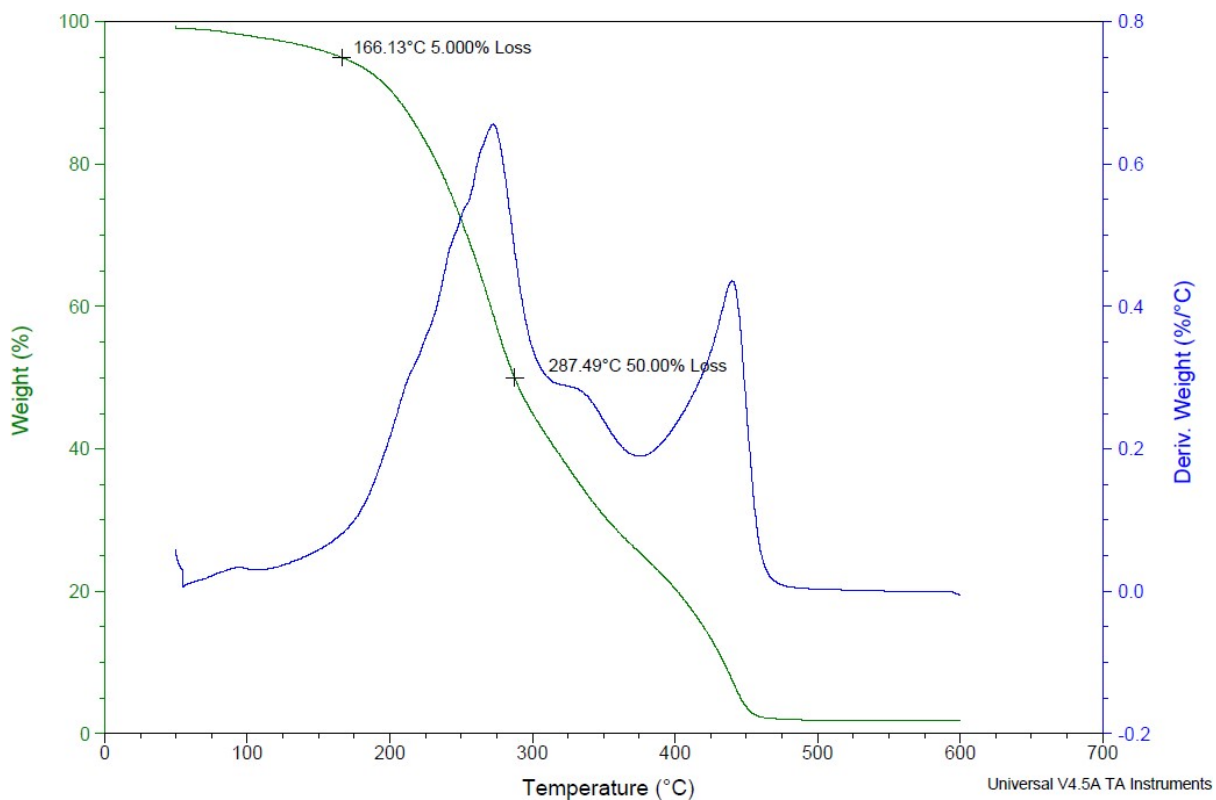

**Figure S59.** TGA thermogram of entry 15, Table 4.

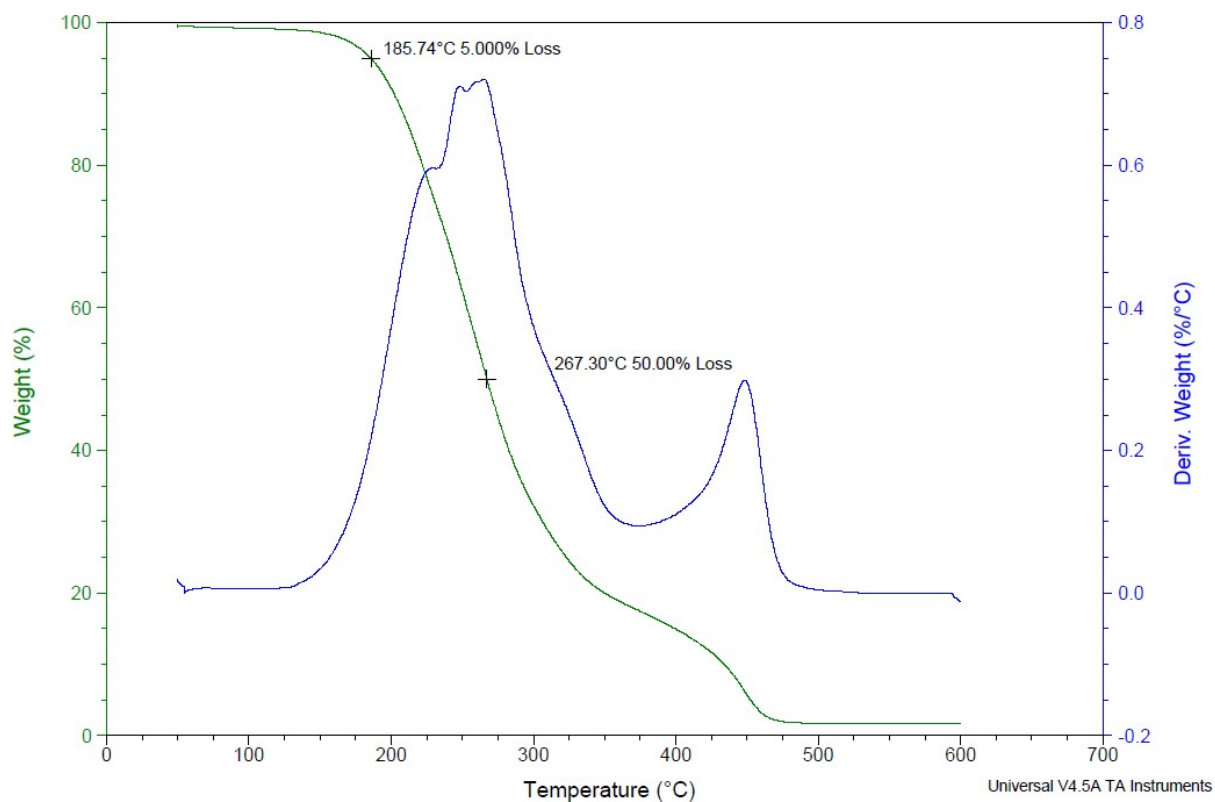

**Figure S60.** TGA thermogram of entry 16, Table 4.

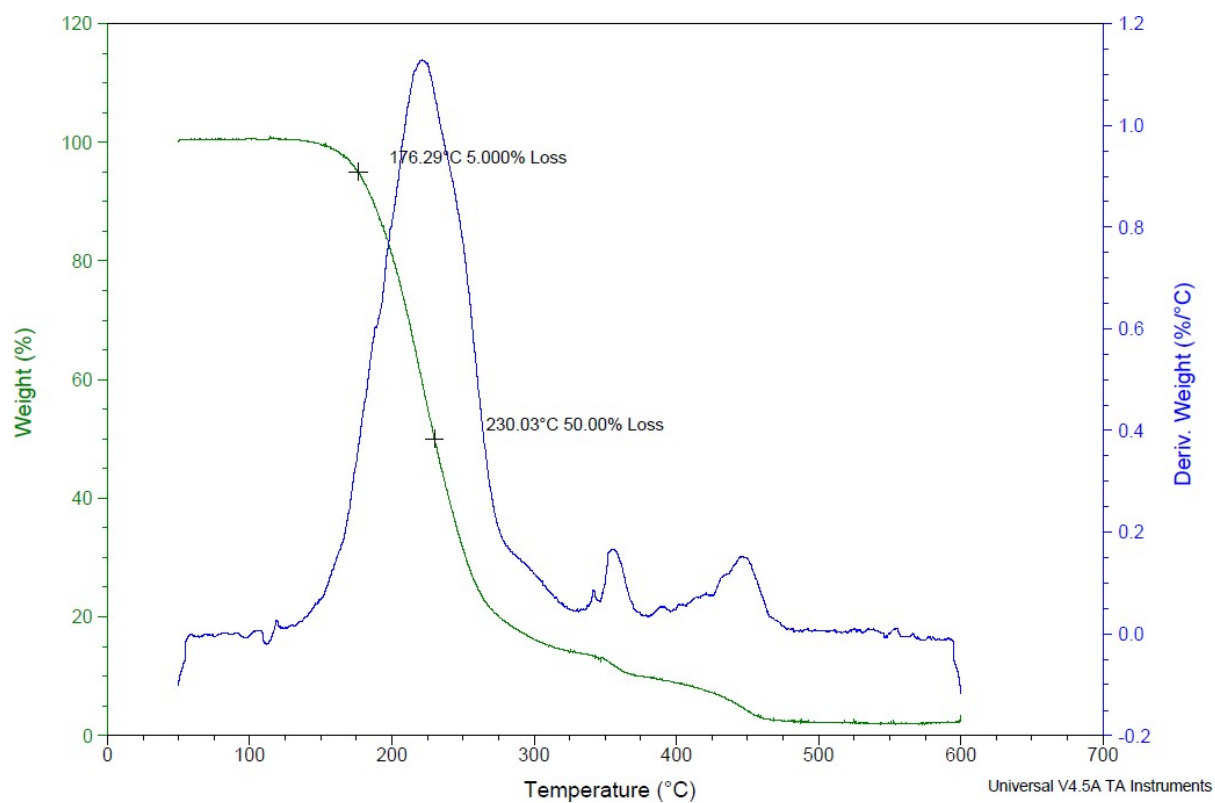

**Figure S61.** TGA thermogram of entry 17, Table 4.

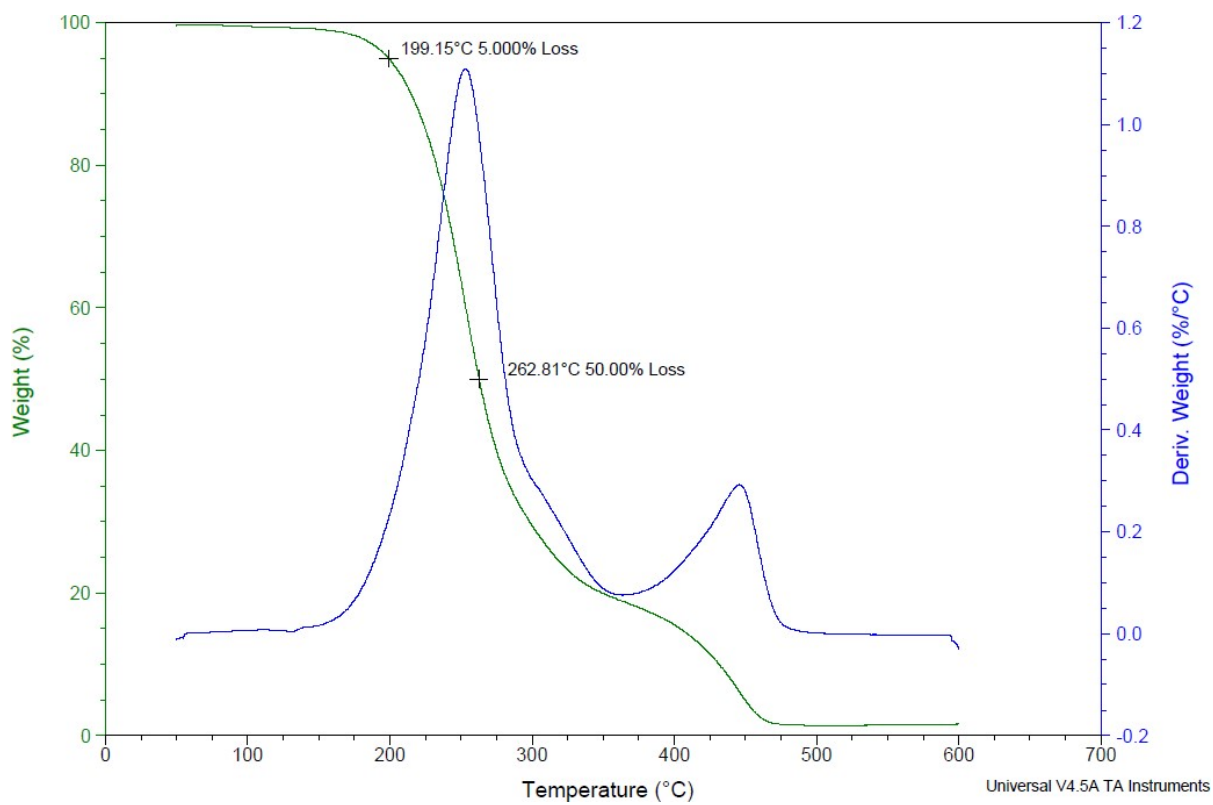

**Figure S62.** TGA thermogram of entry 18, Table 4.

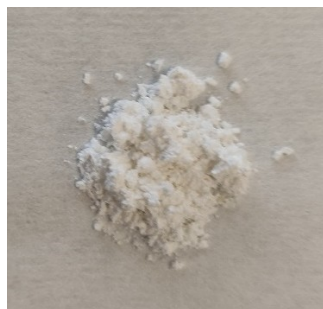

**Figure S63.** A typical polymer sample, entry 1, Table 4.

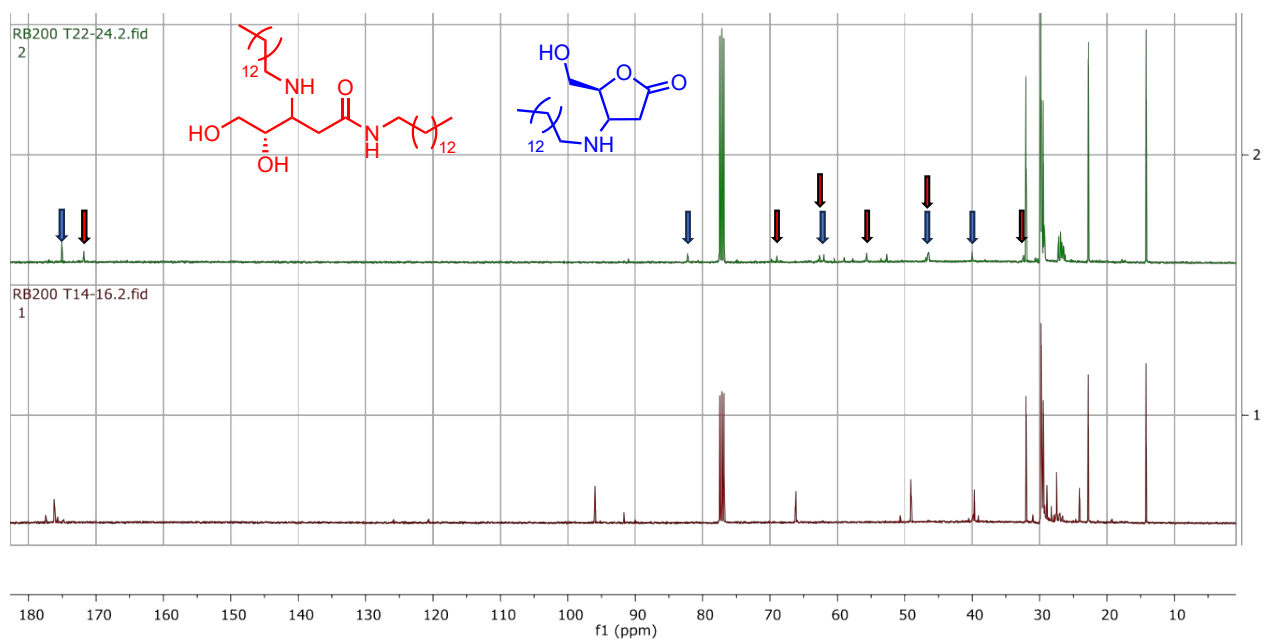

**Figure S64.**  $^{13}\text{C}$  NMR spectra of two partially purified samples from the mecanochemistry reaction onto HBO suggesting the aza-Michael addition.
